# Supplementary material for: Wnt-driven LARGE2 mediates laminin-adhesive O-glycosylation in human colonic epithelial cells and colorectal cancer
Source: PubMed Central journal article supplement (PMC7315491; doi:10.1186/s12964-020-00561-6), 2020-06-25

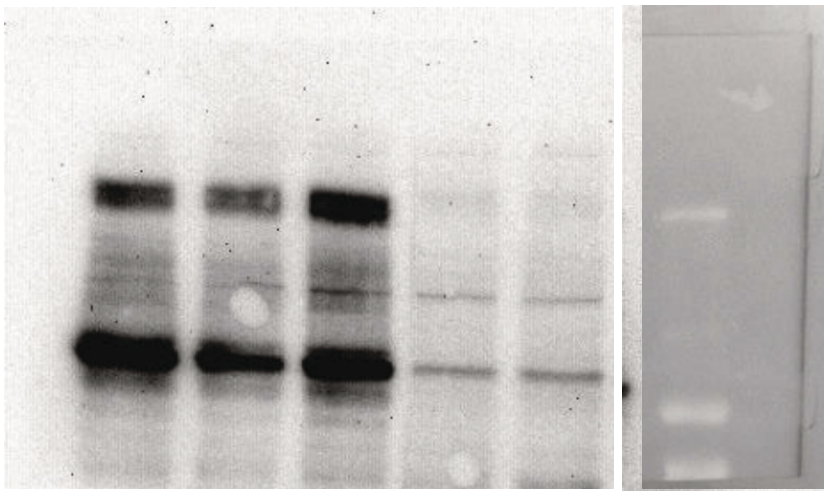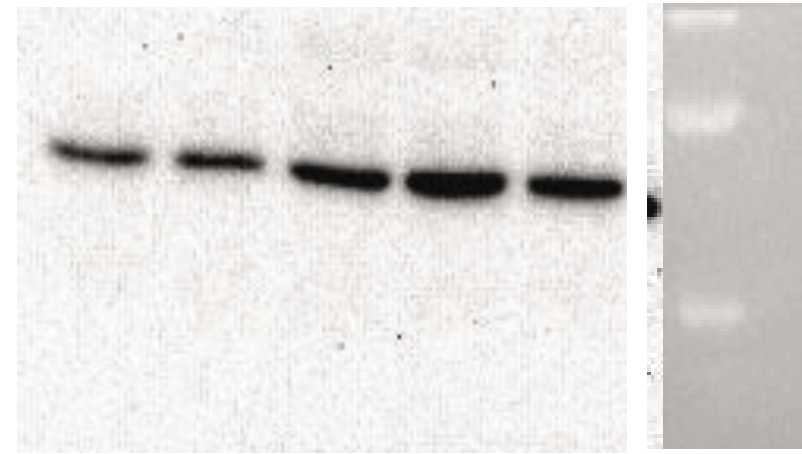

Figure 3B

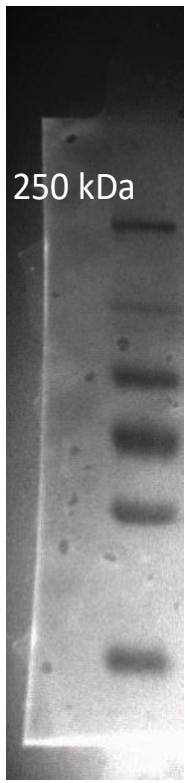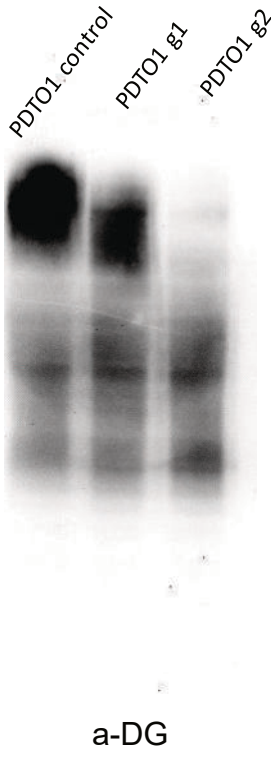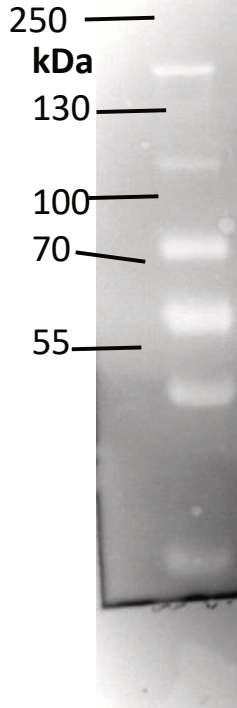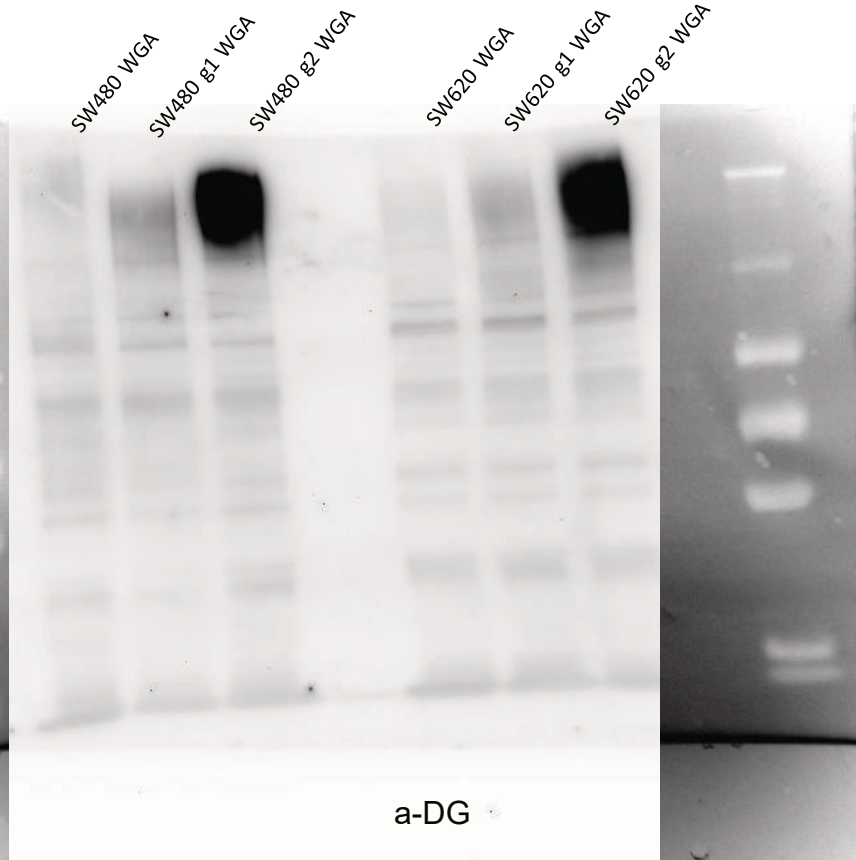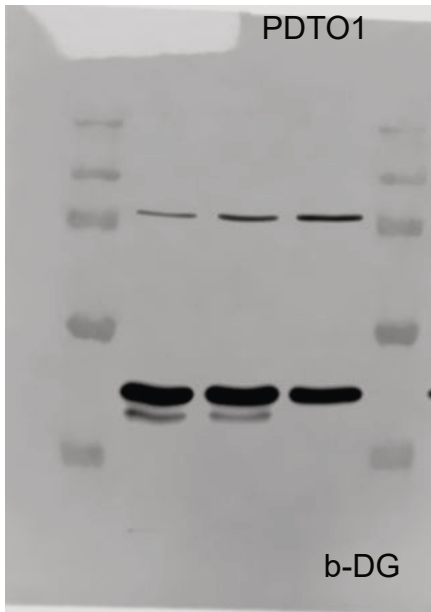

b-DG: 42-15 kDa (splice variants)

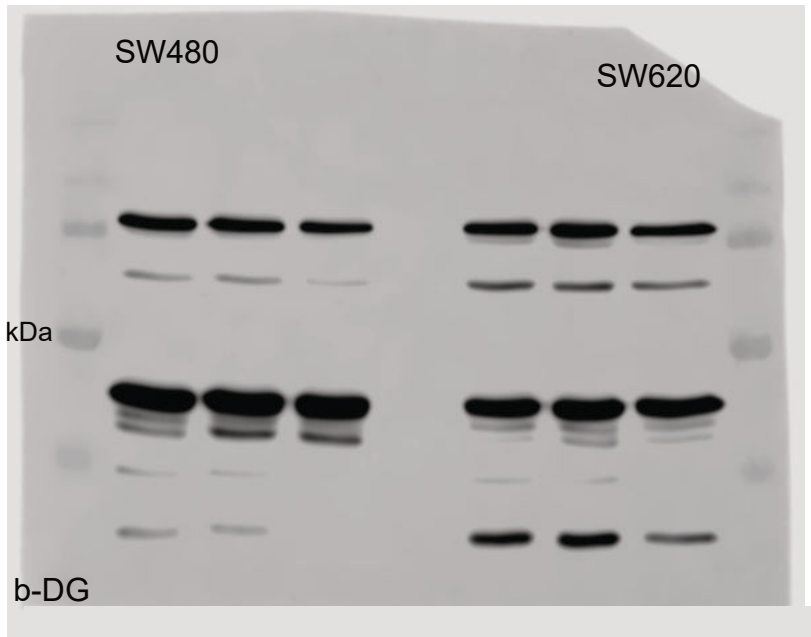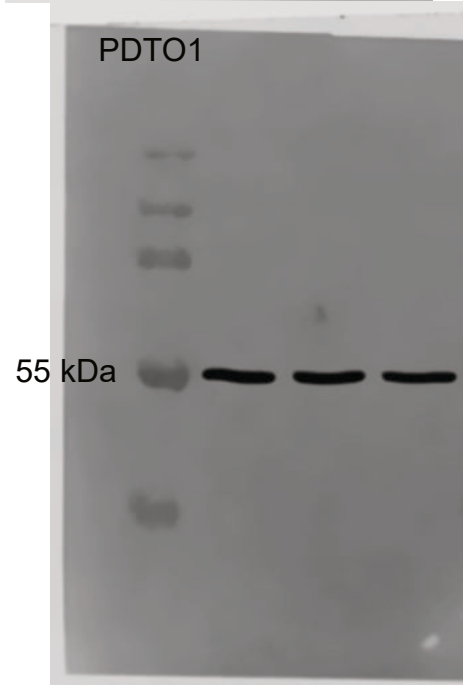

Tubulin: 56 kDa

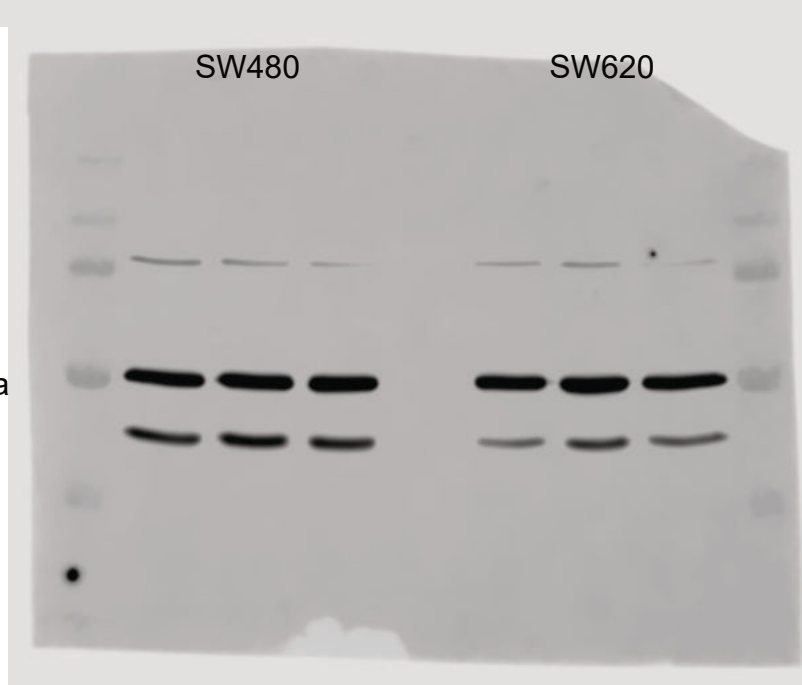

Figure 3C

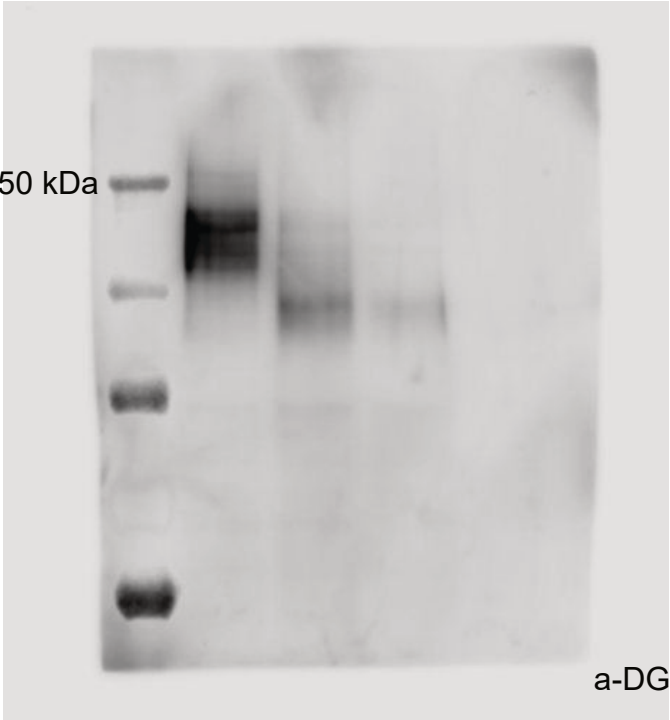

LS174T

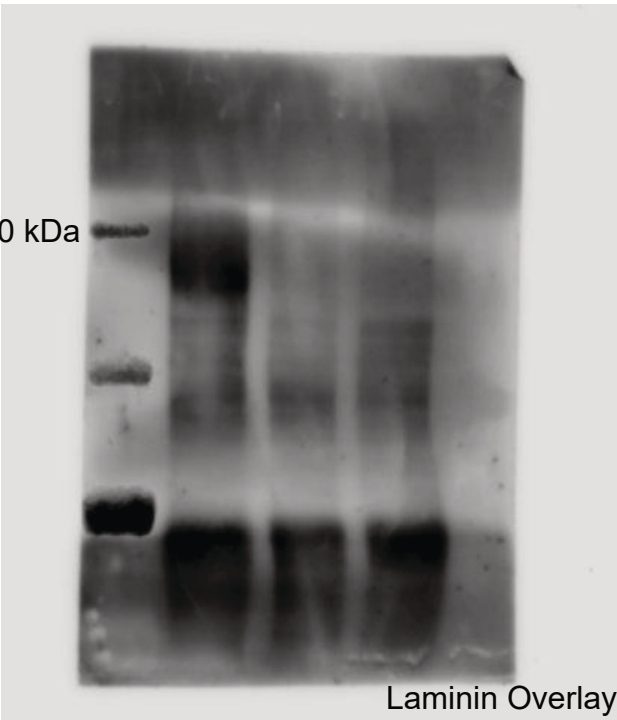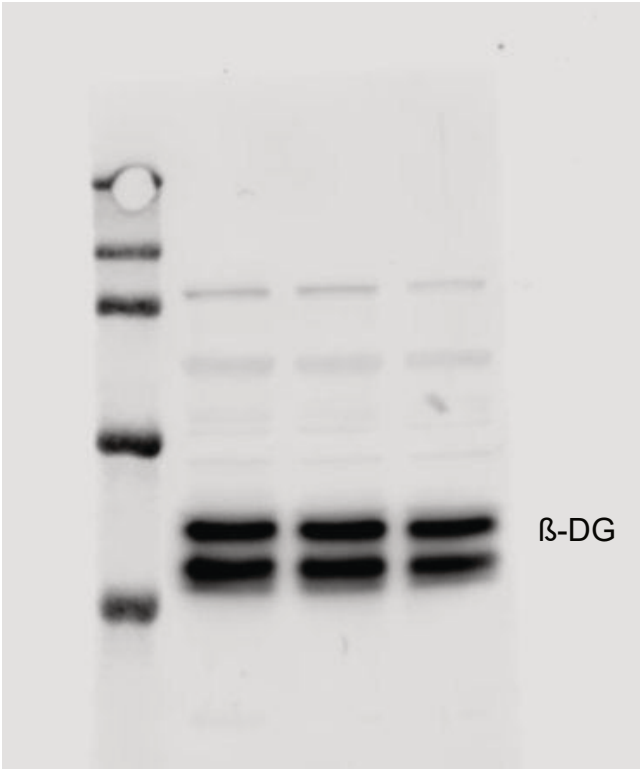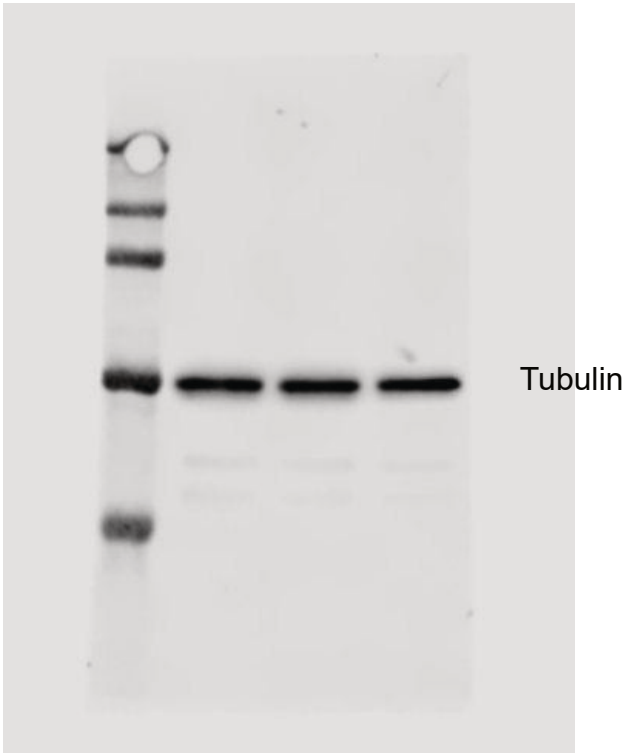

Figure 3E

HT-29

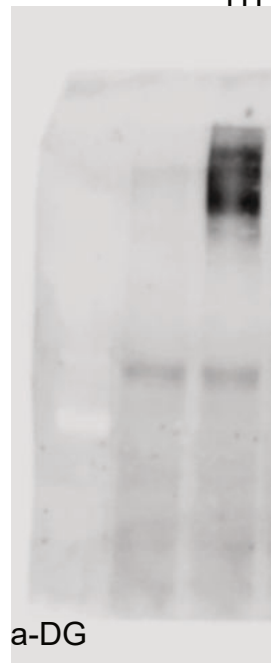

α-DG

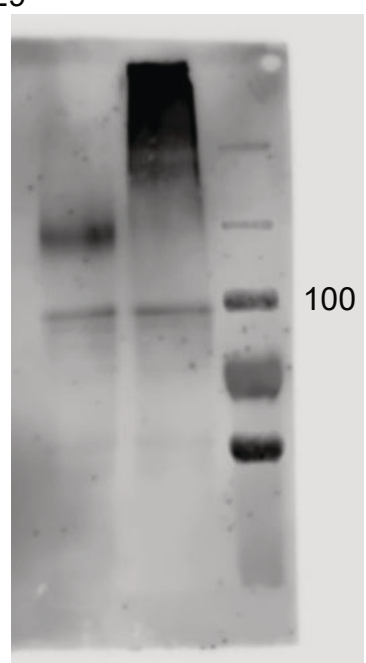

100 kDa

Laminin Overlay

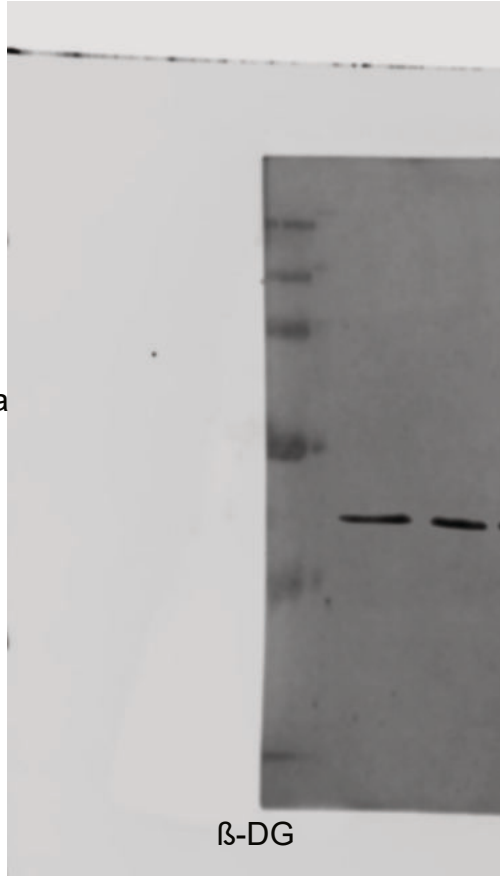

β-DG

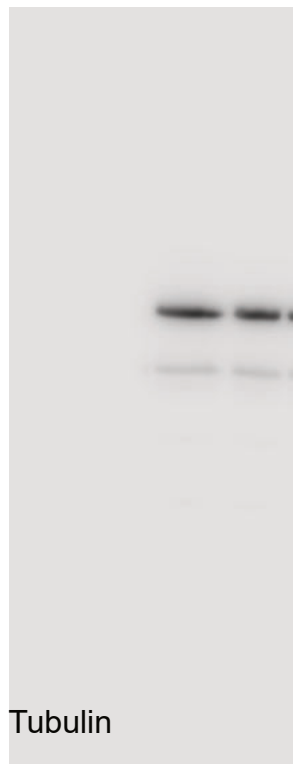

Tubulin

Figure 4A

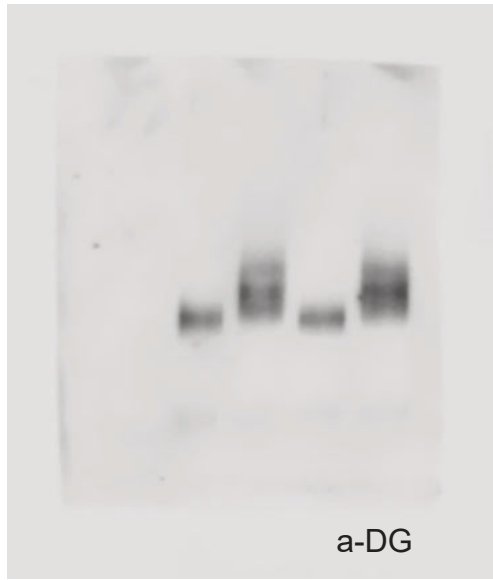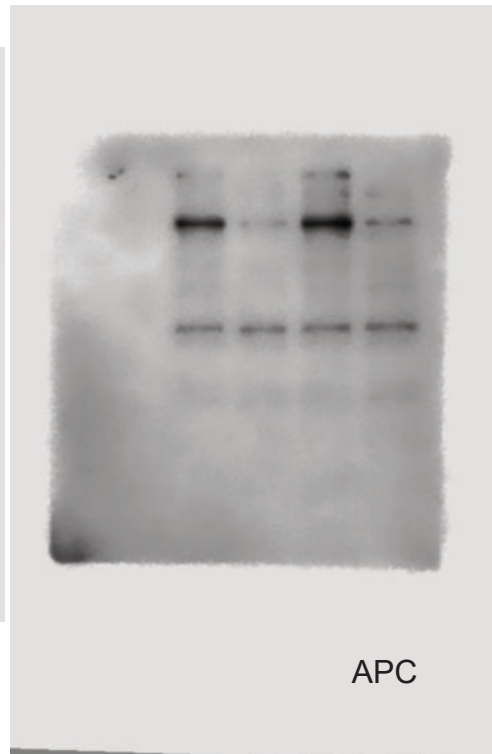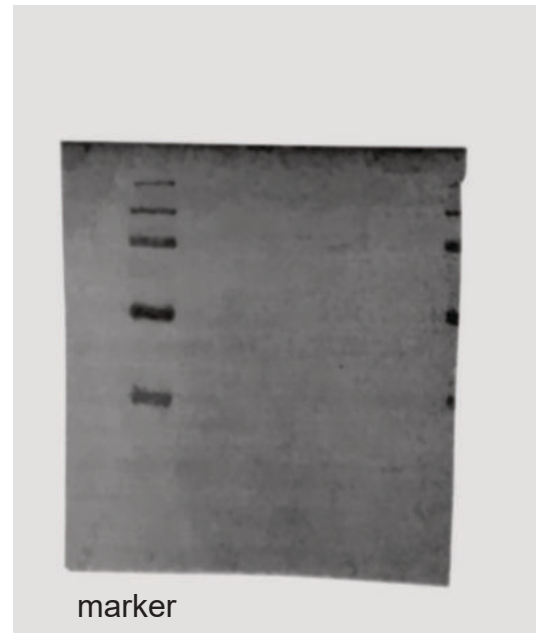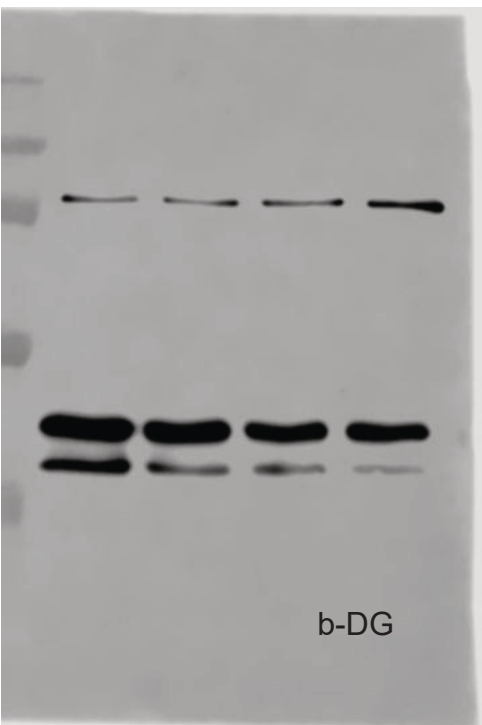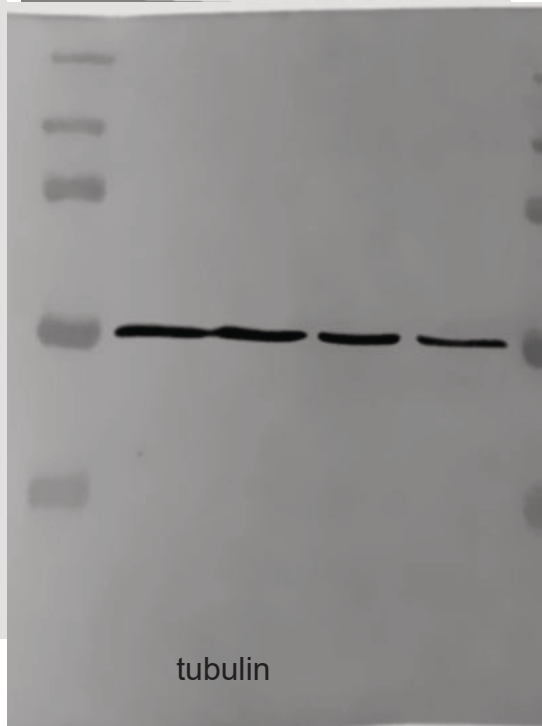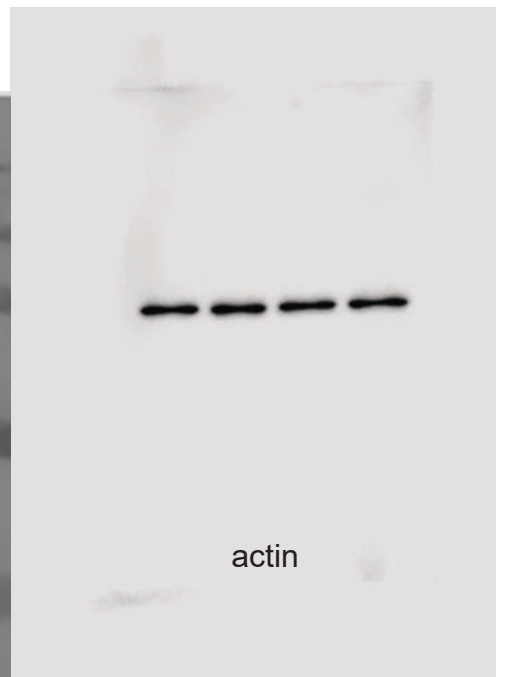

Figure 4B

HT-29

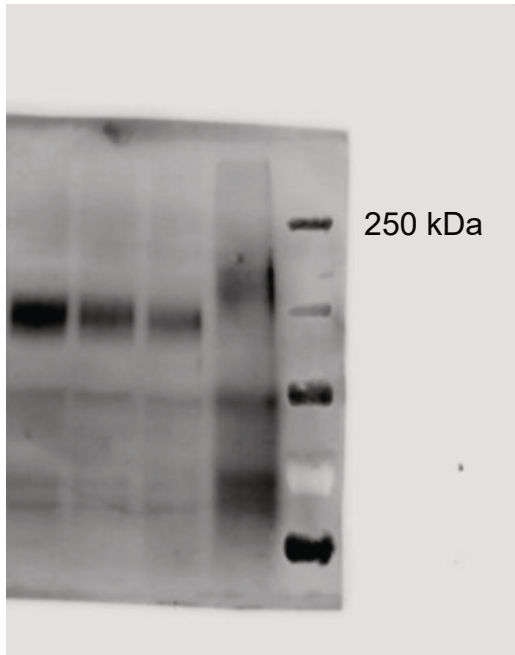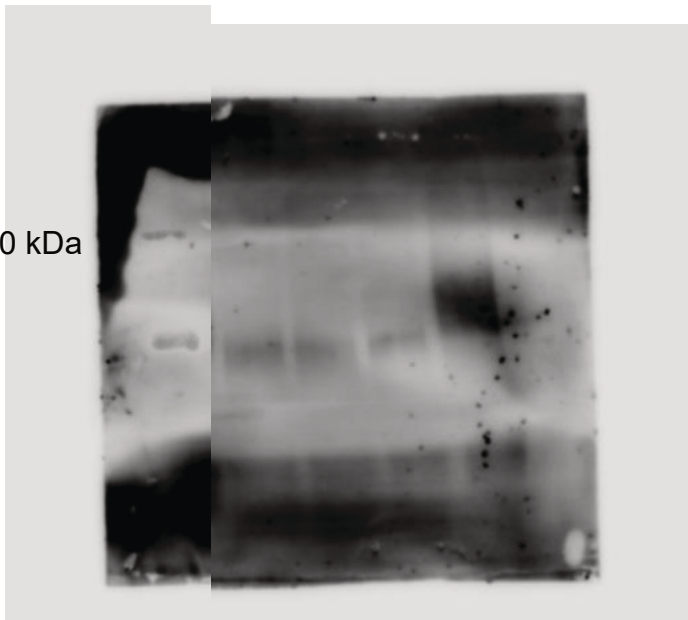

Laminin Overlay

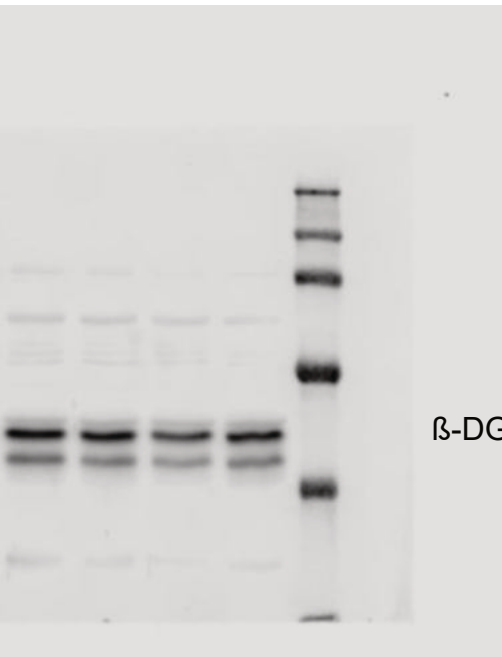

Tubulin

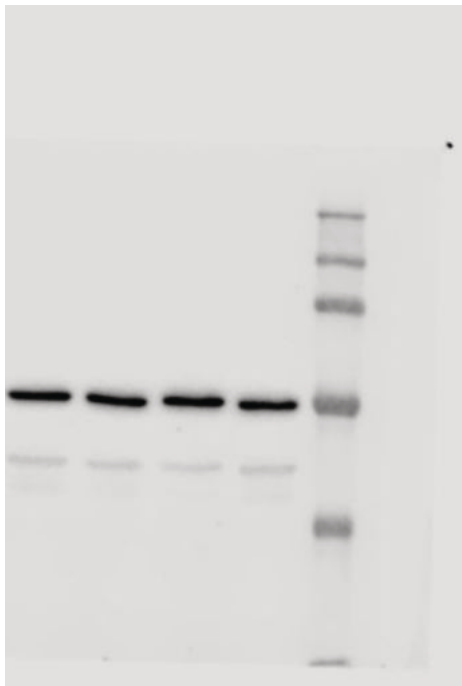

Figure 4C

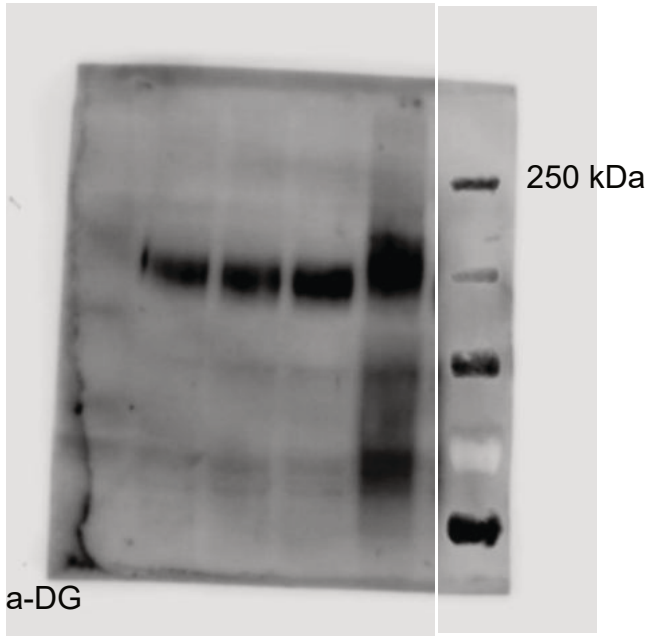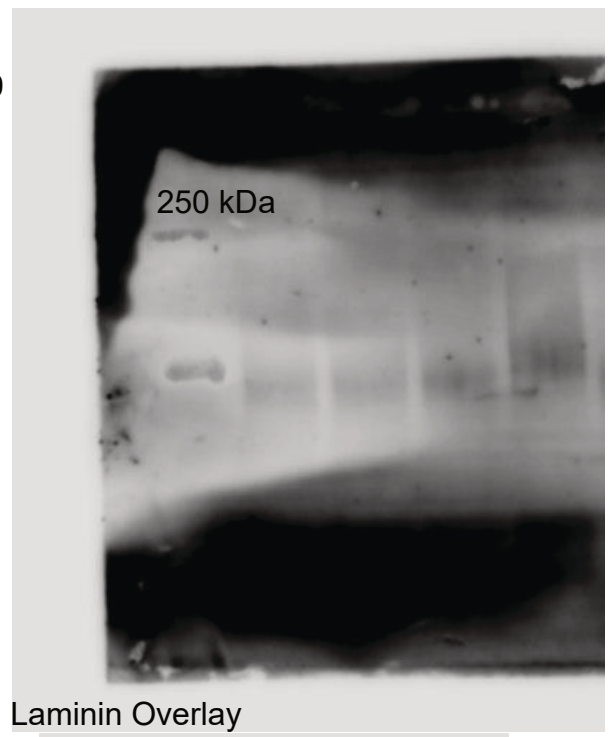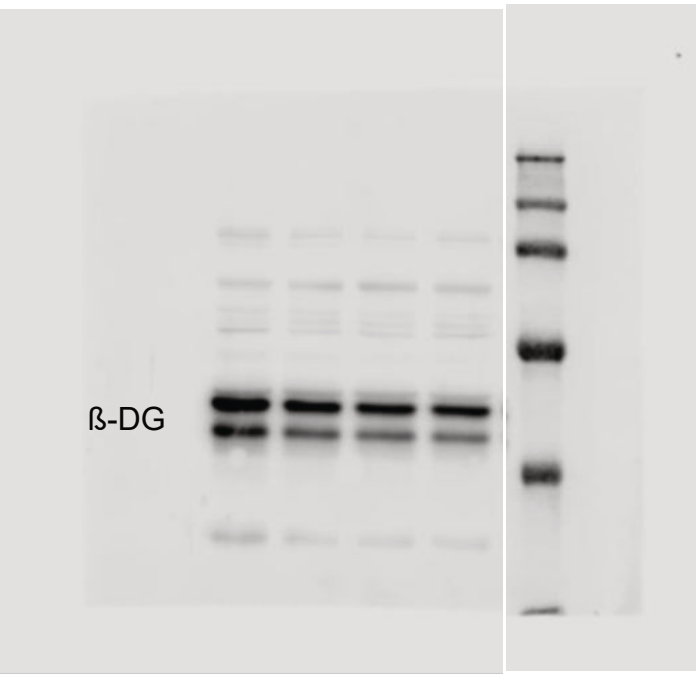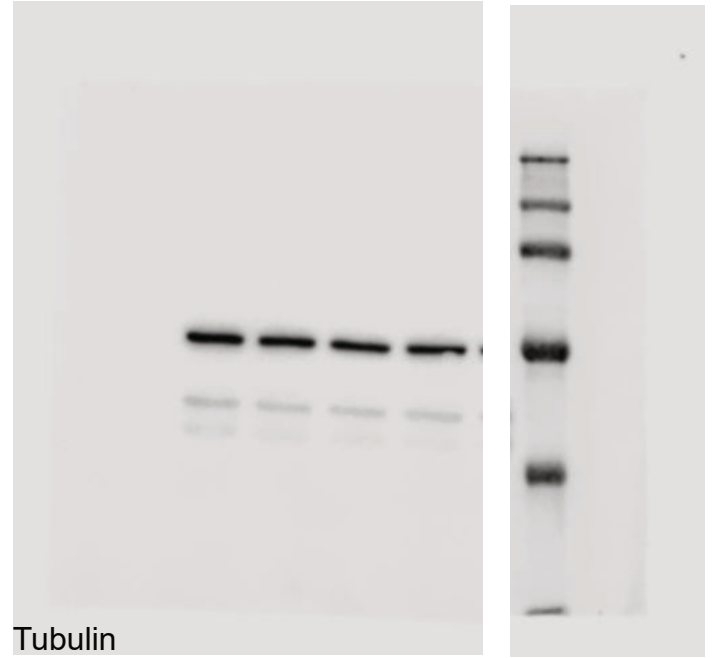

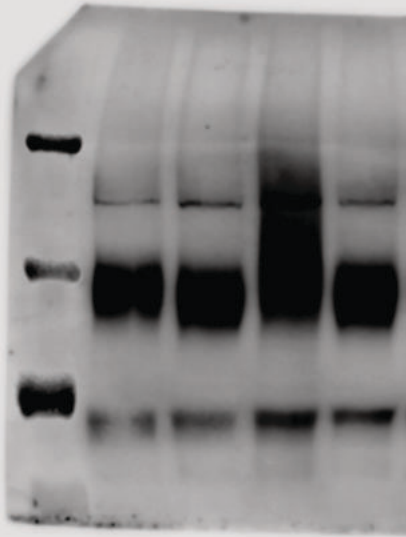

aDG

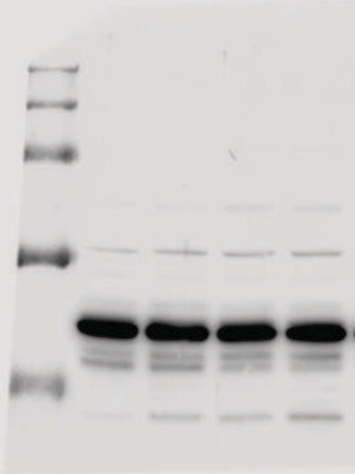

bDG

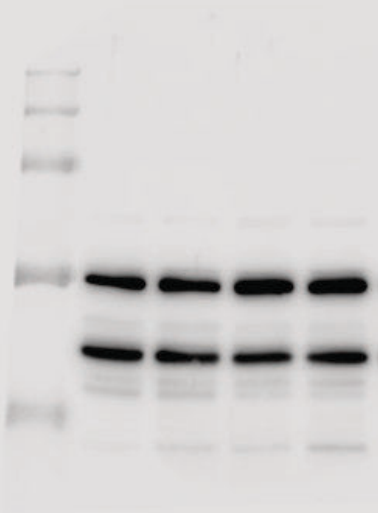

Tubulin



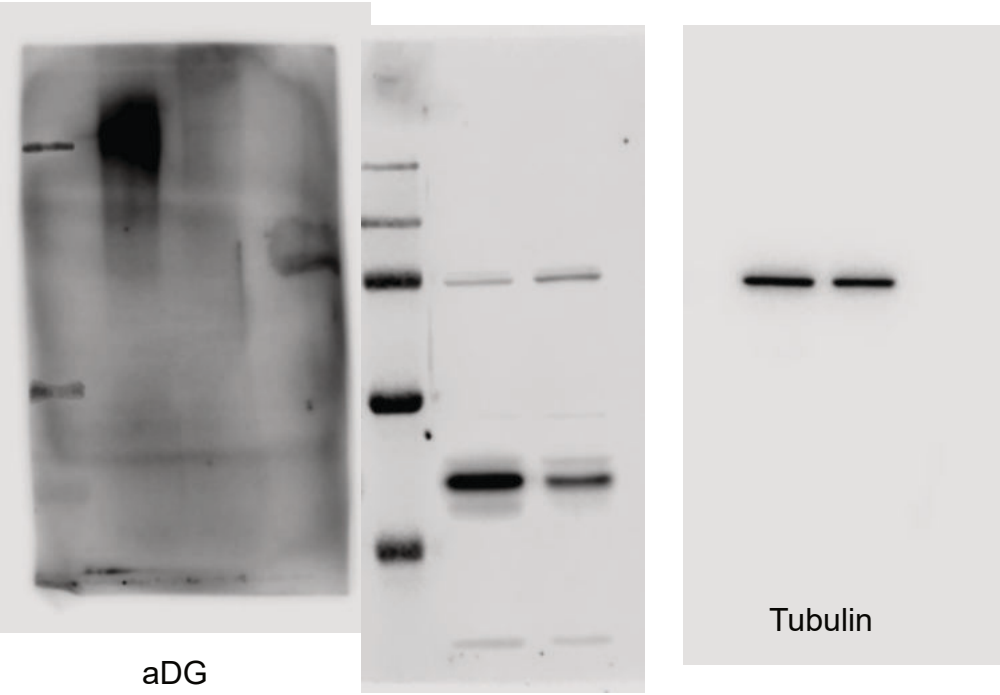

aDG

b-DG

Tubulin

Figure 4G

SW480 ERT - NE

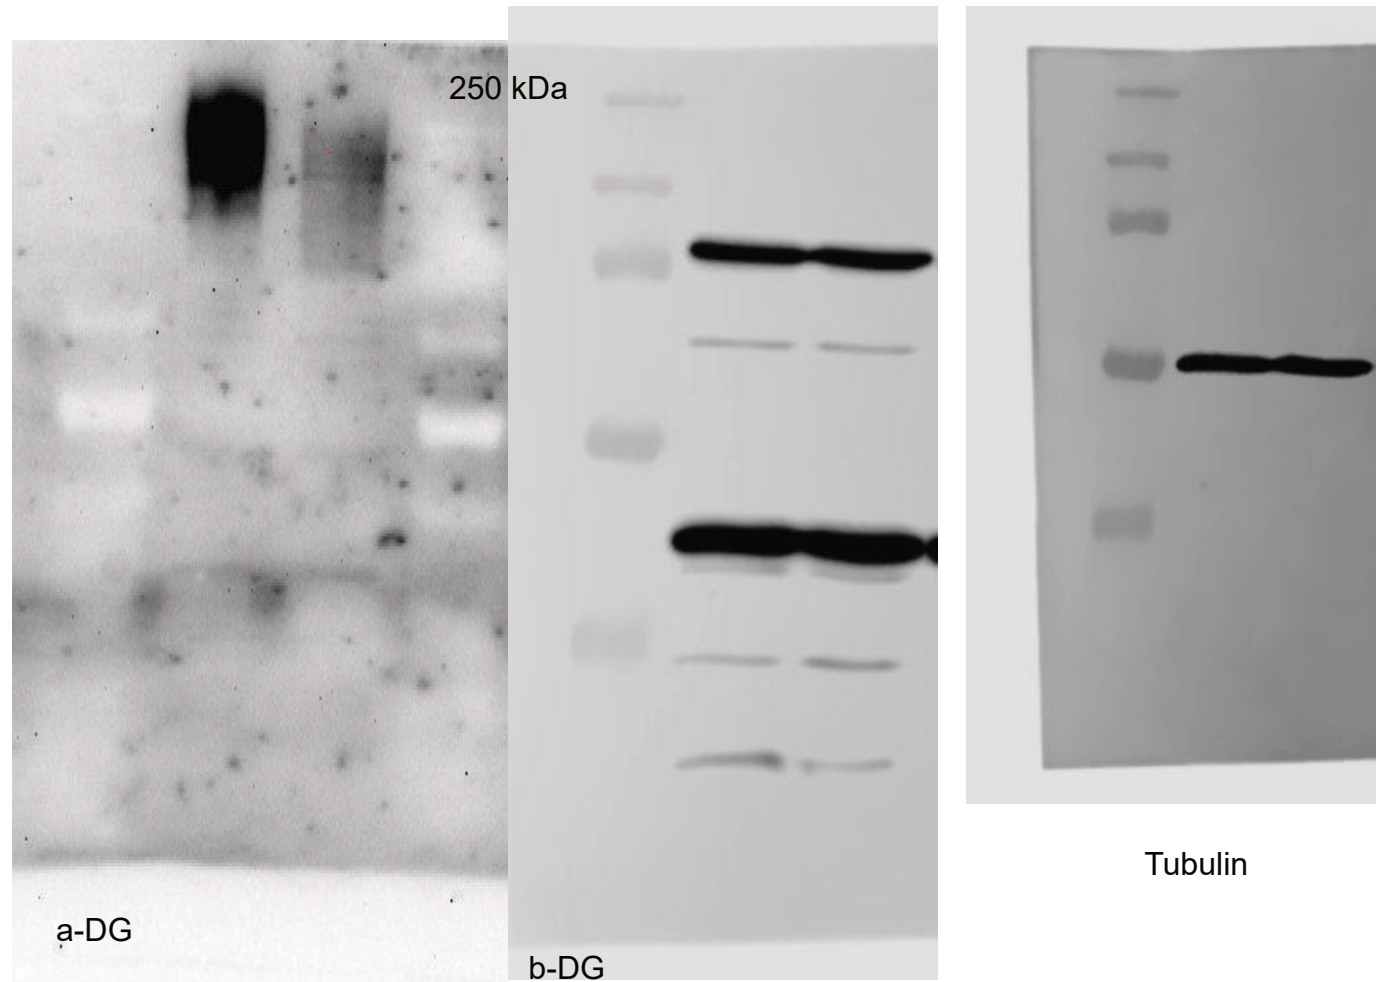

Figure 4H

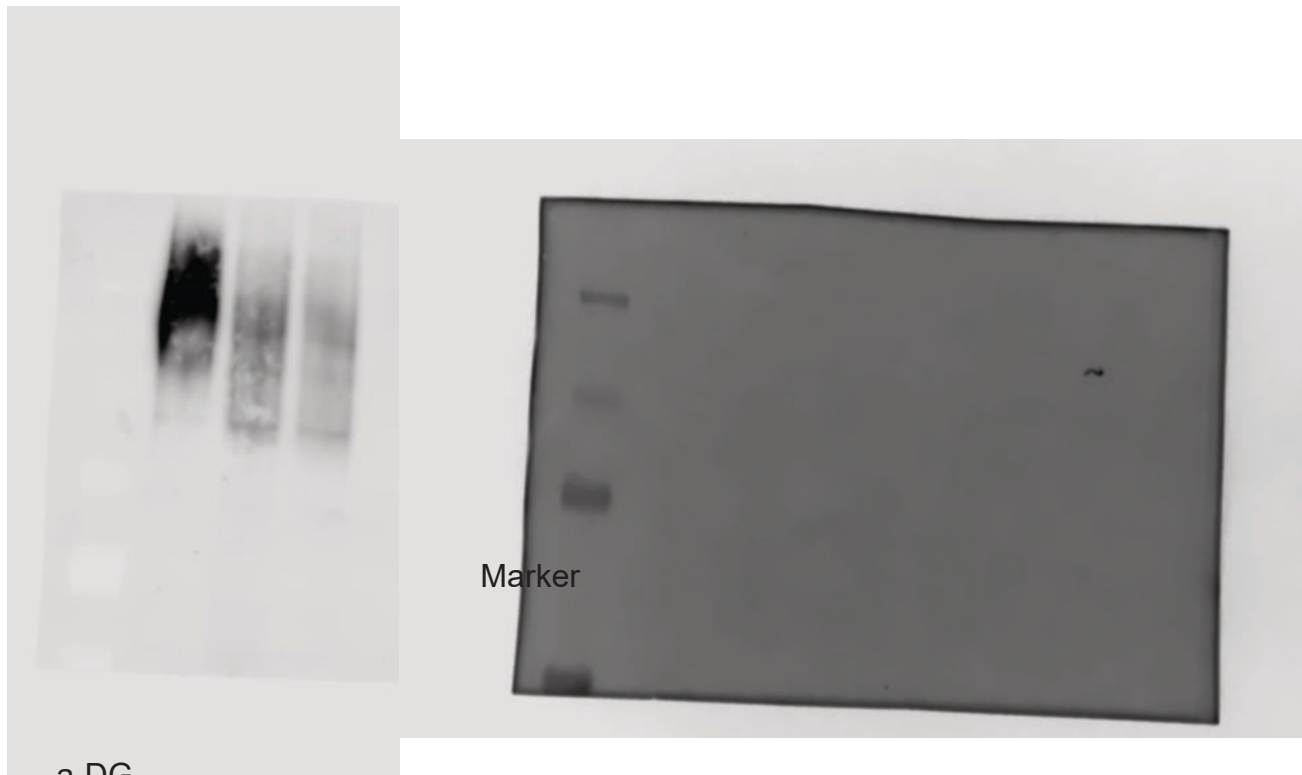

a-DG

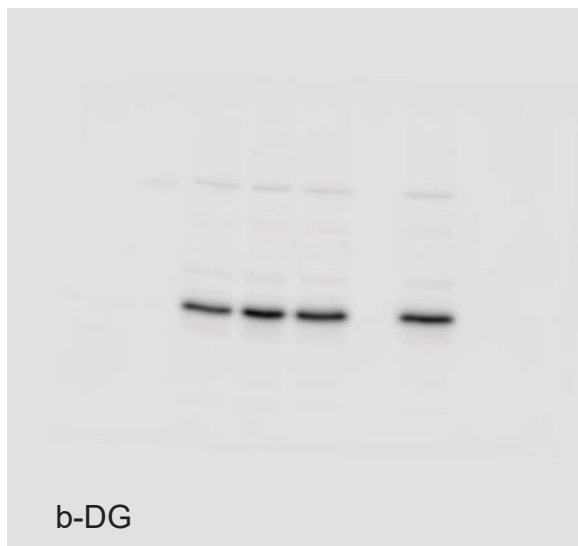

b-DG

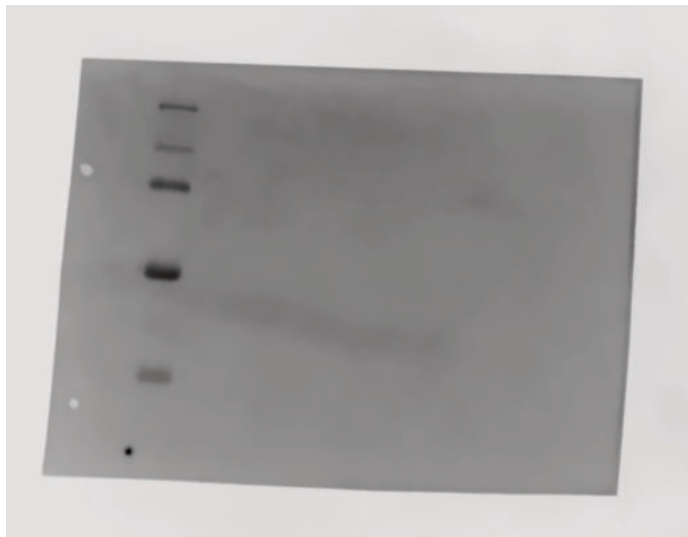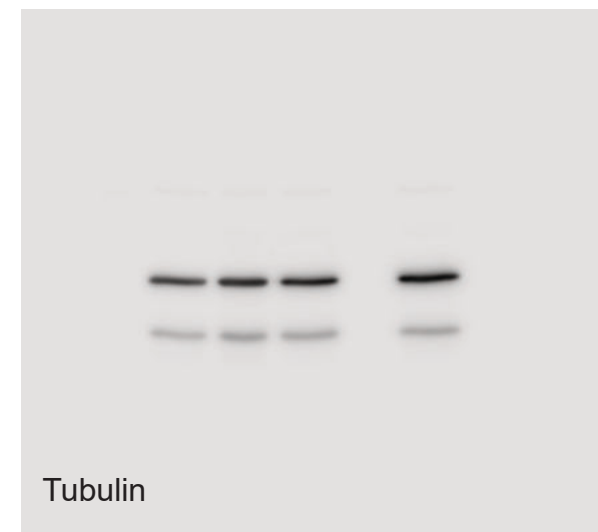

Tubulin

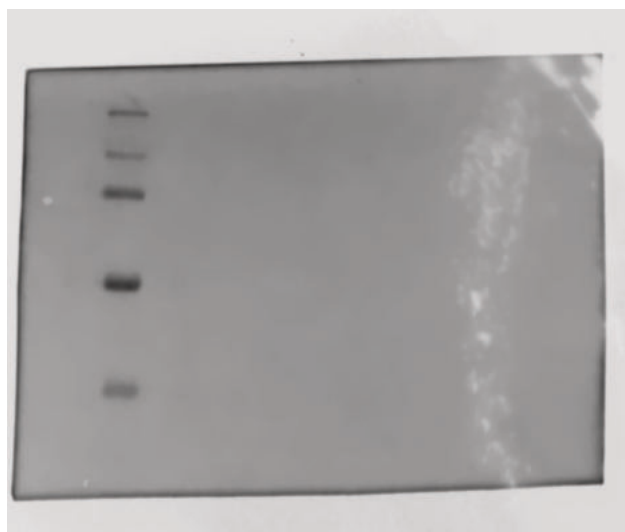

Figure 4I

PDTO1 TCF7L2BS

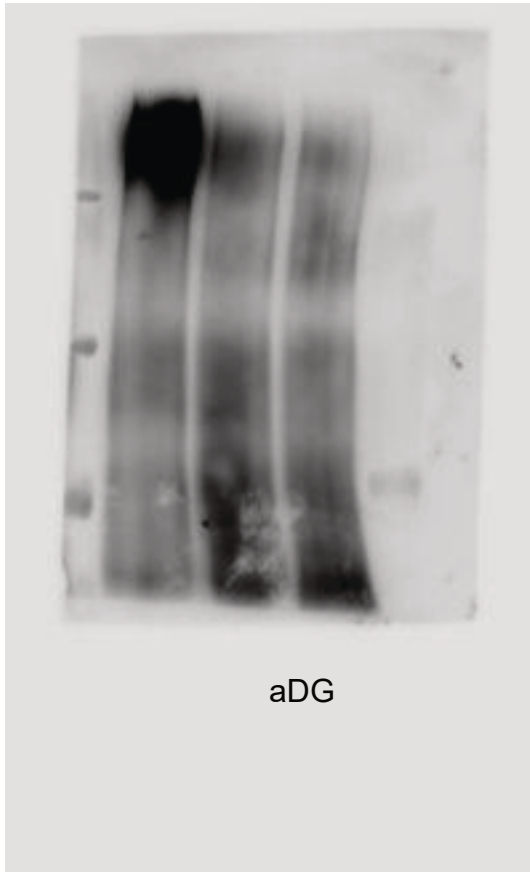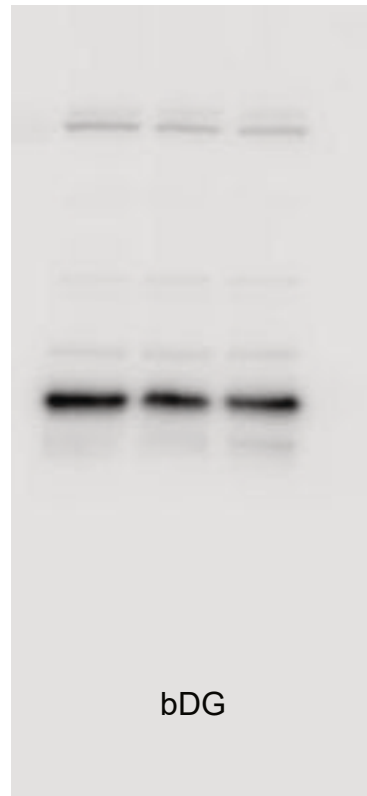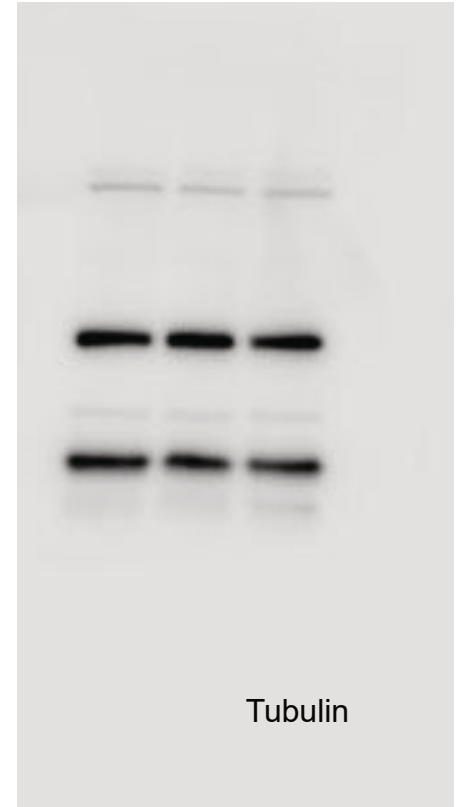

Figure 5C

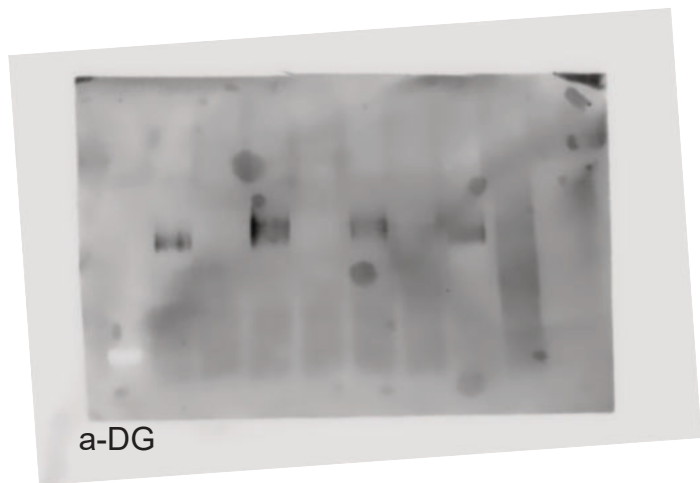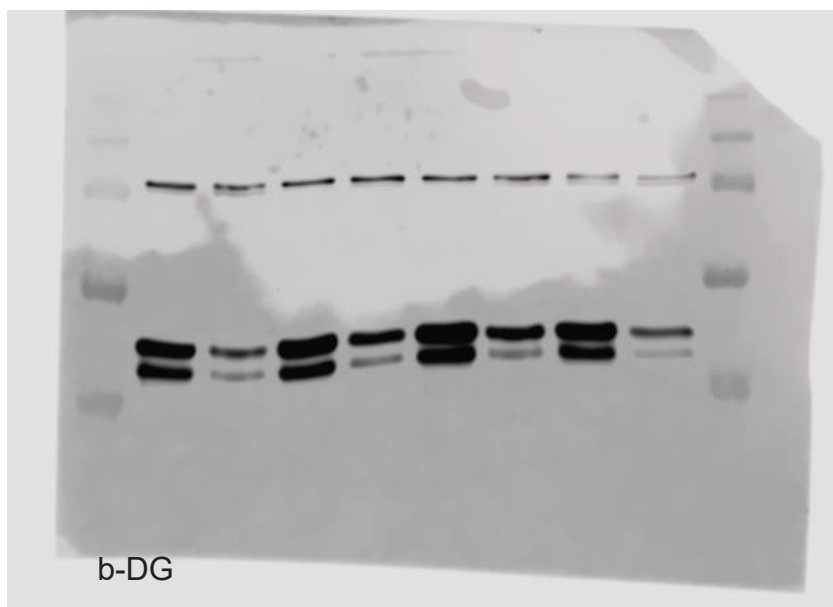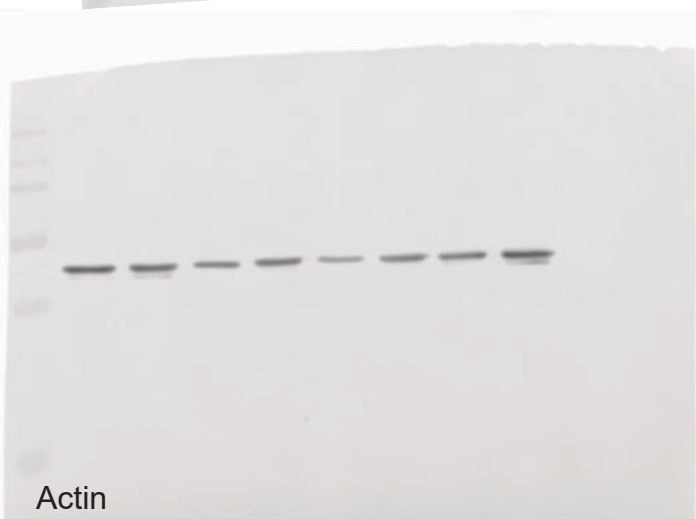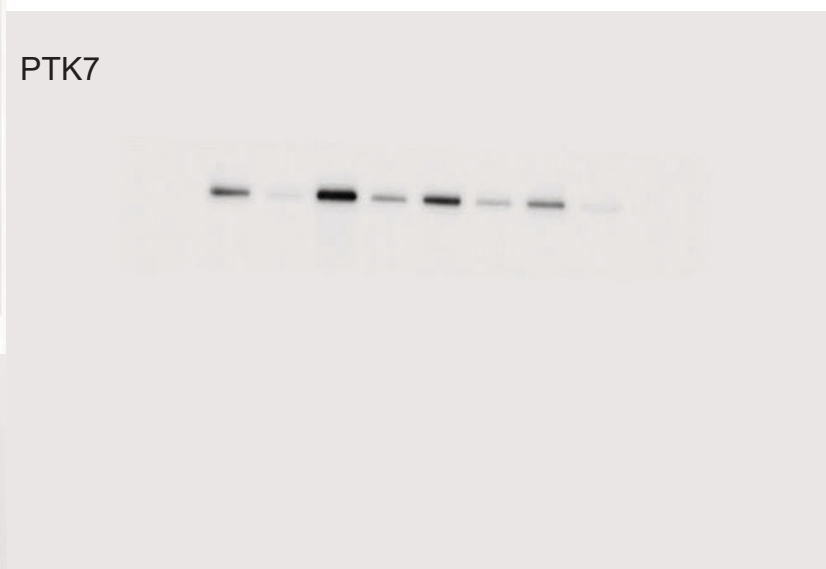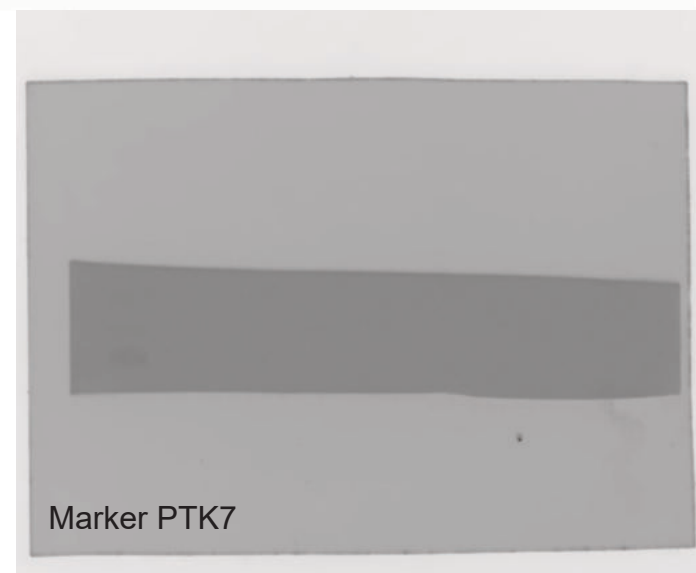

Figure 6J

ADO2

ADO3

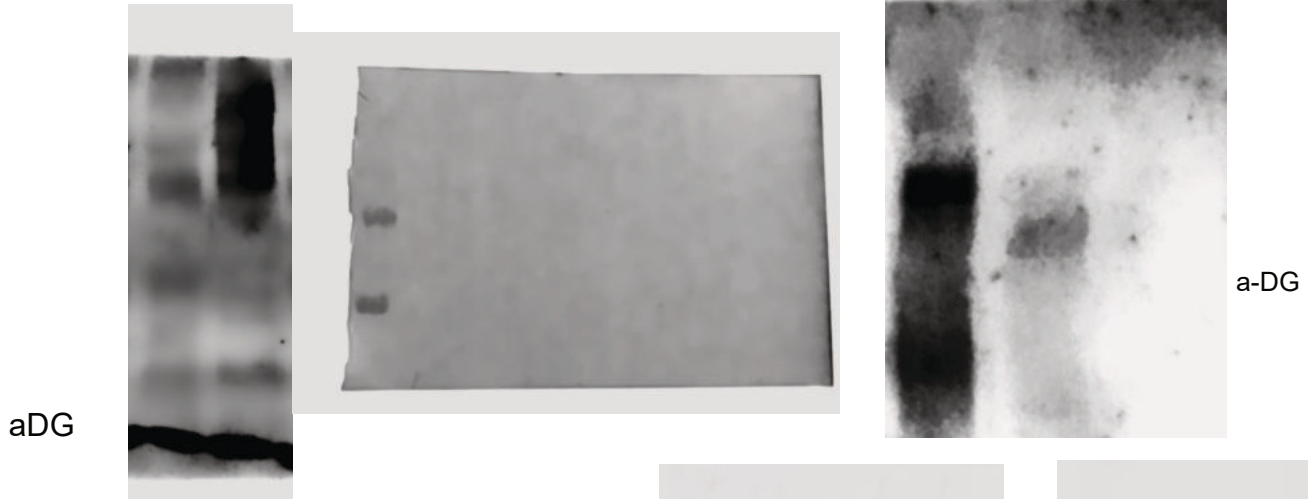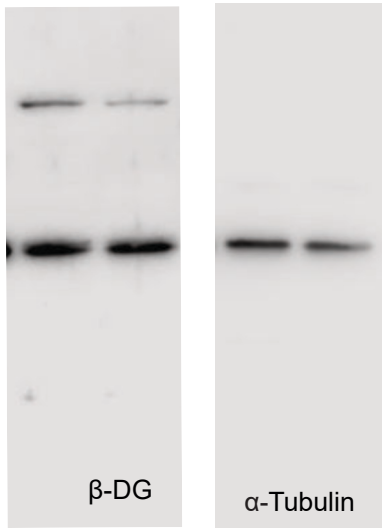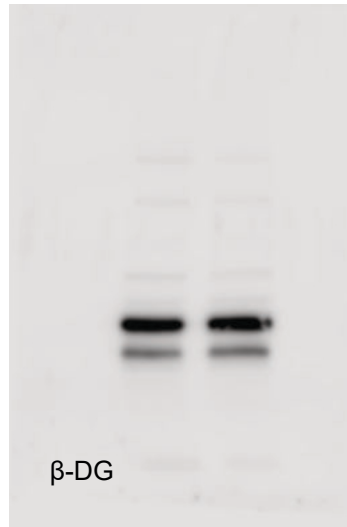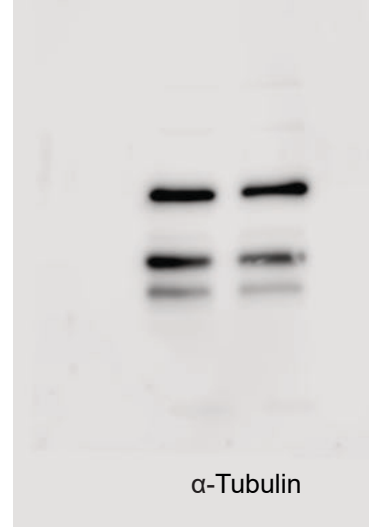

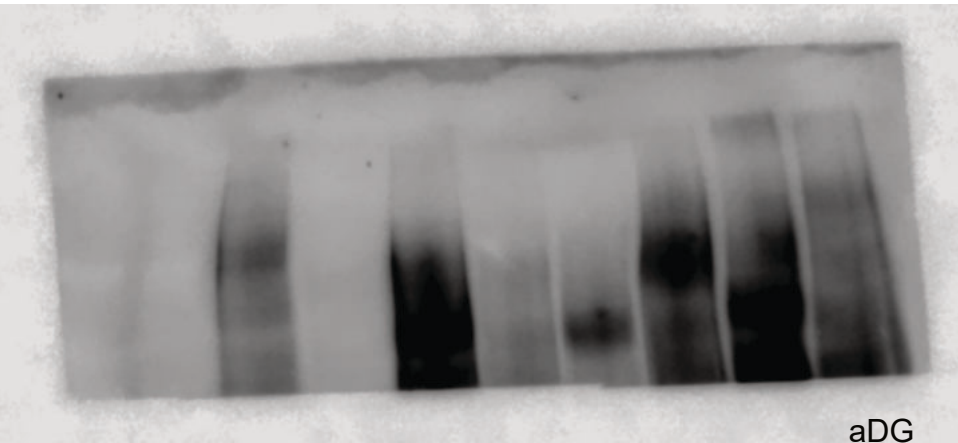

aDG

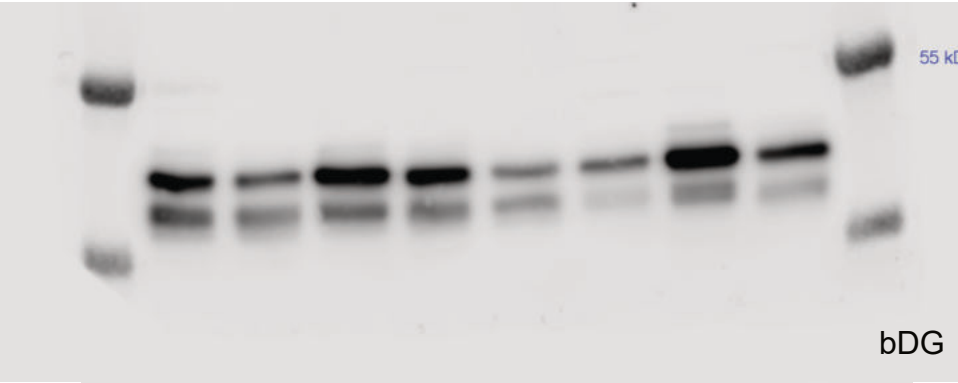

55 k

bDG

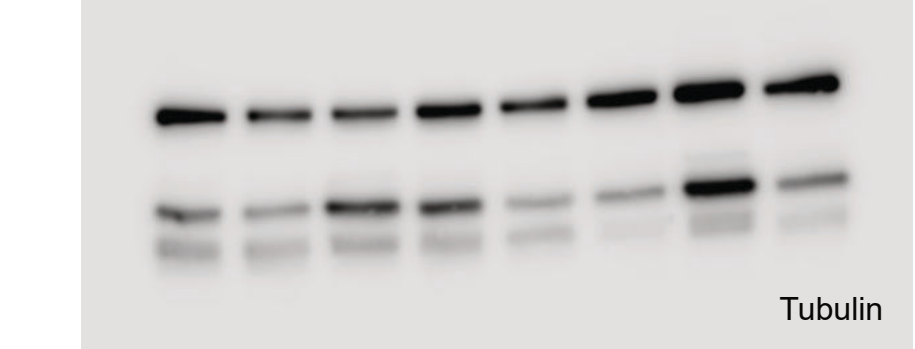

Tubulin

Figure 7F

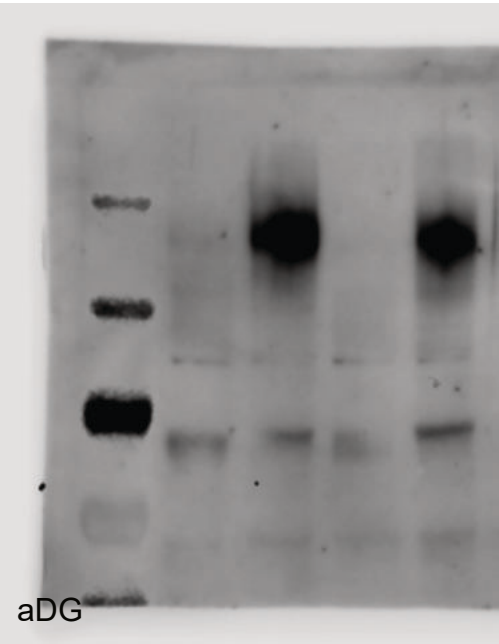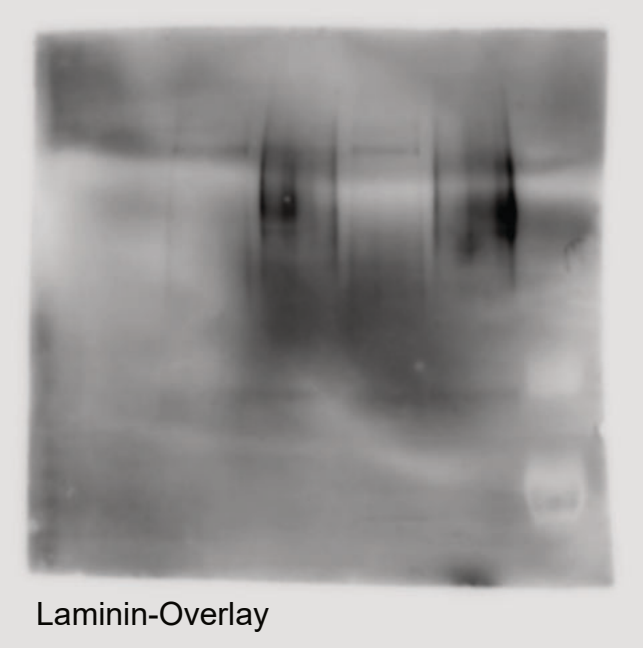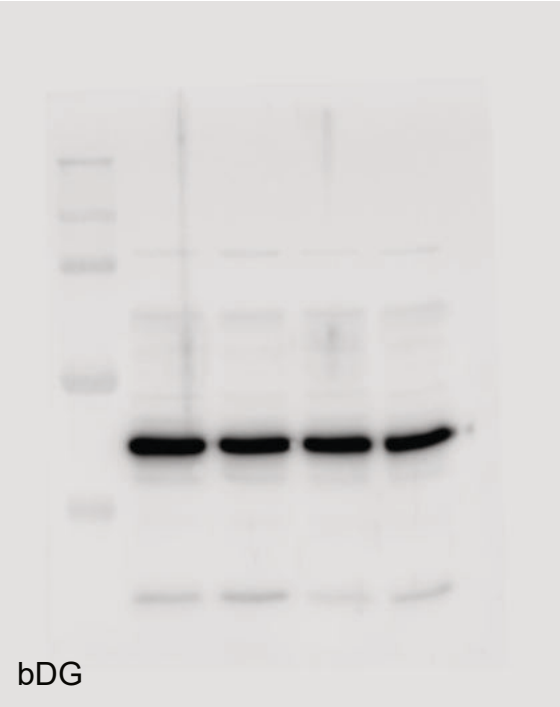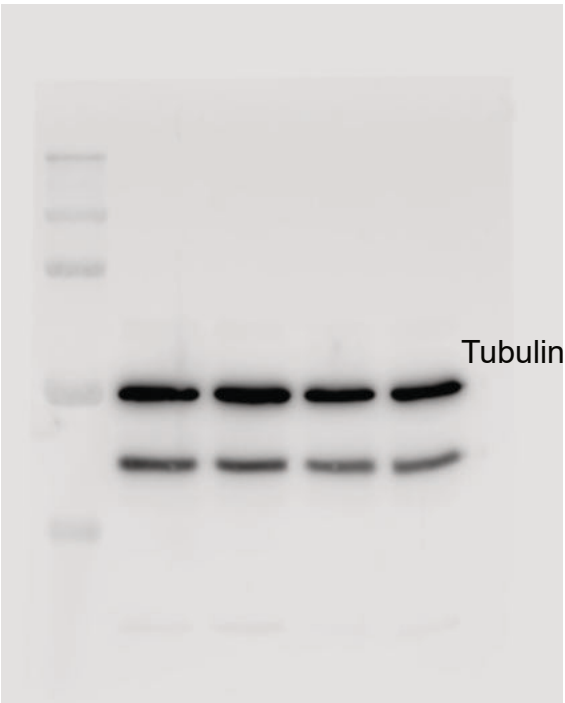



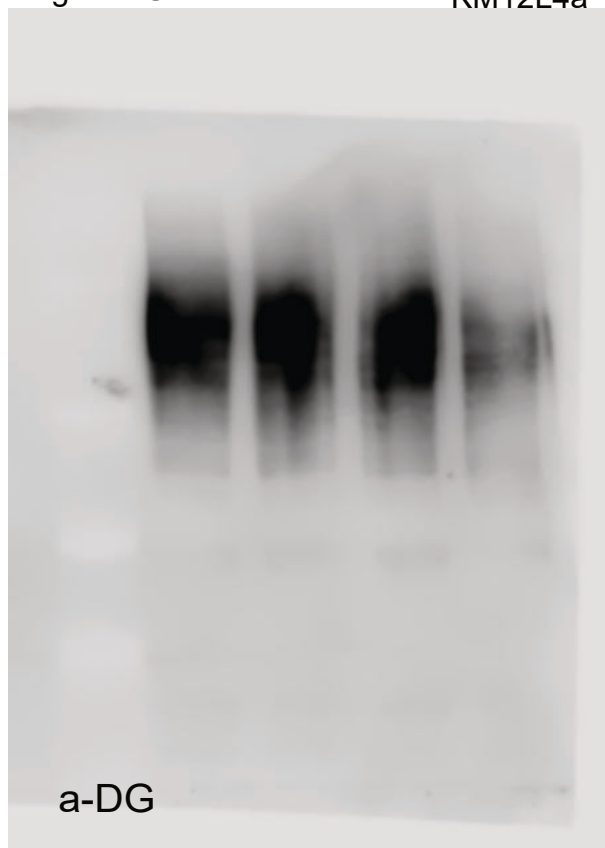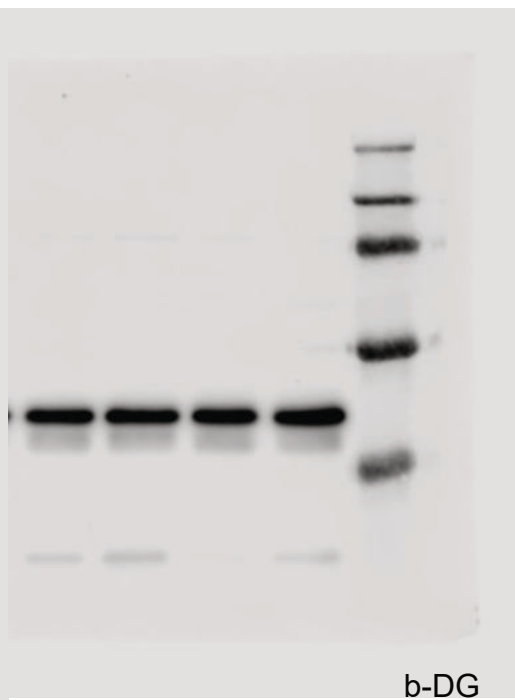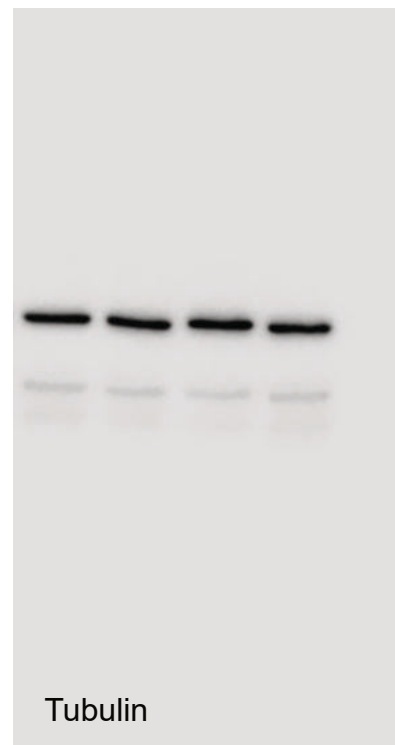

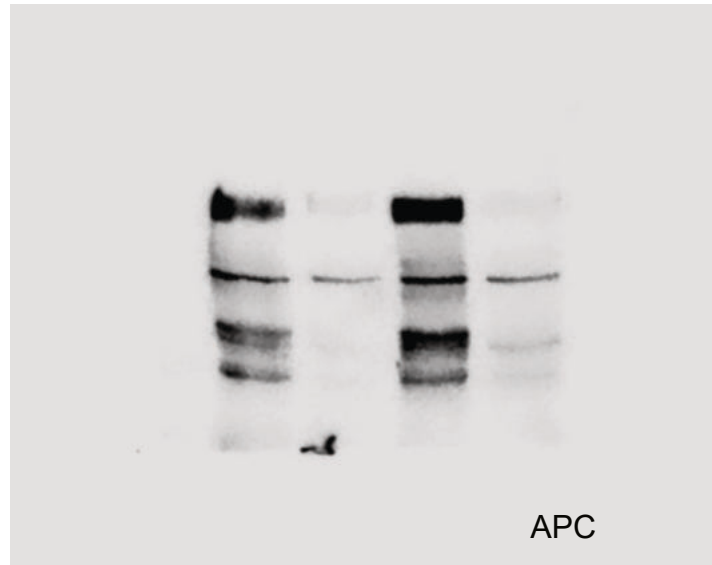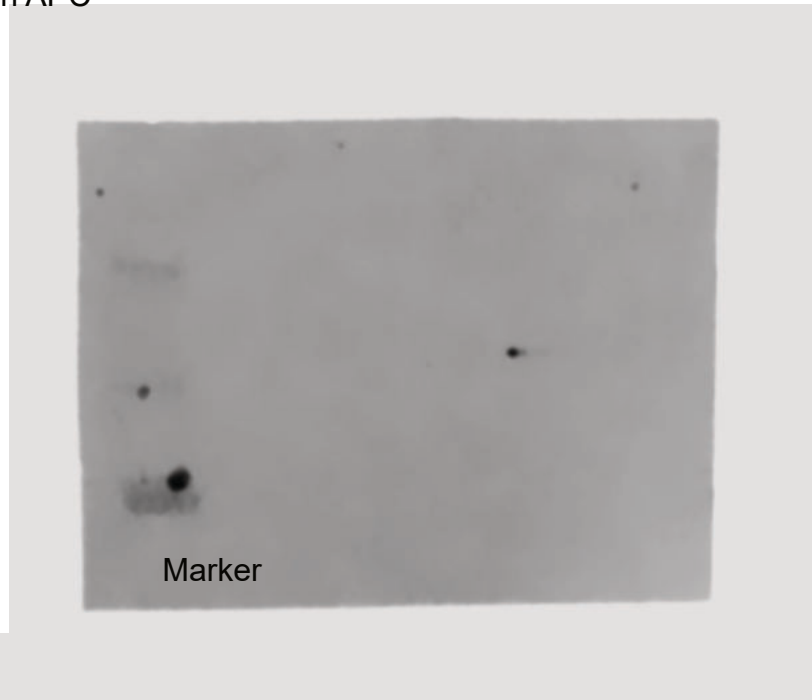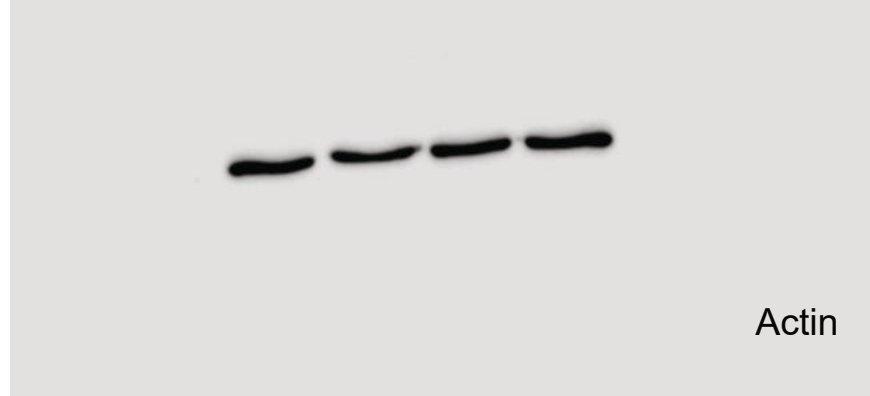

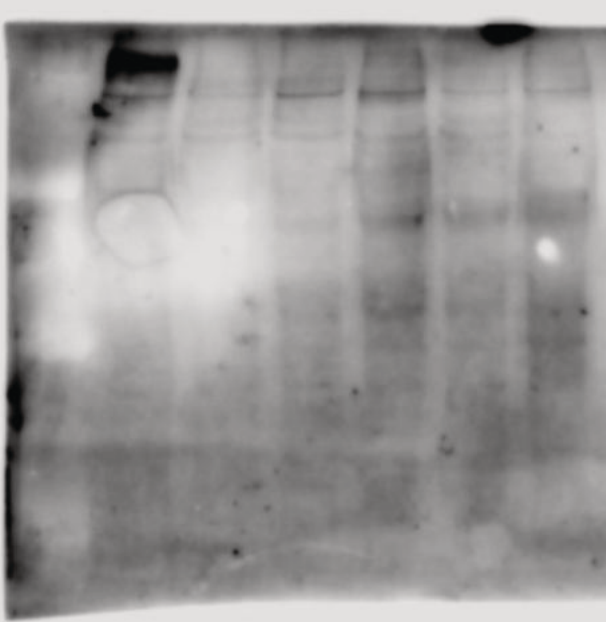

a-DG

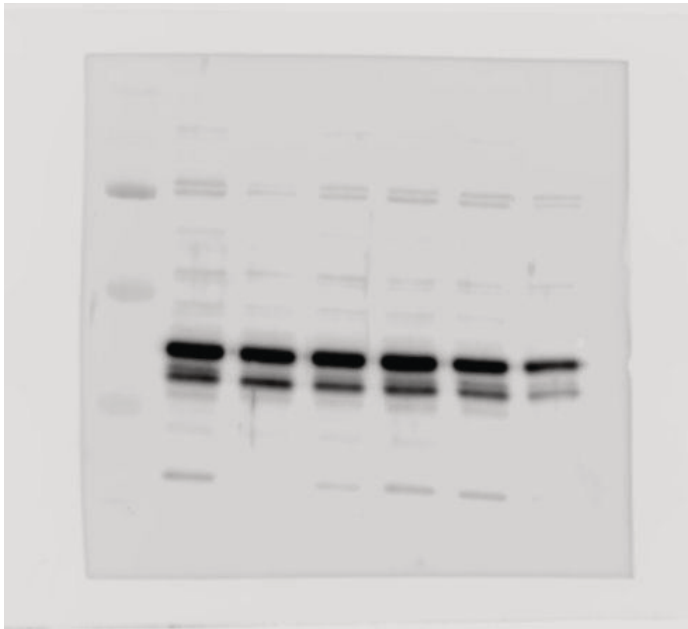

β-DG

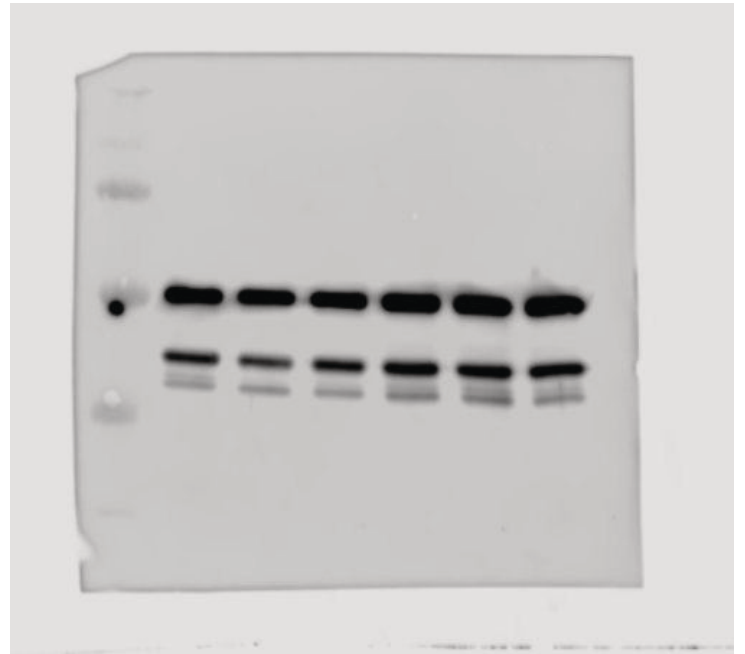

Tubulin

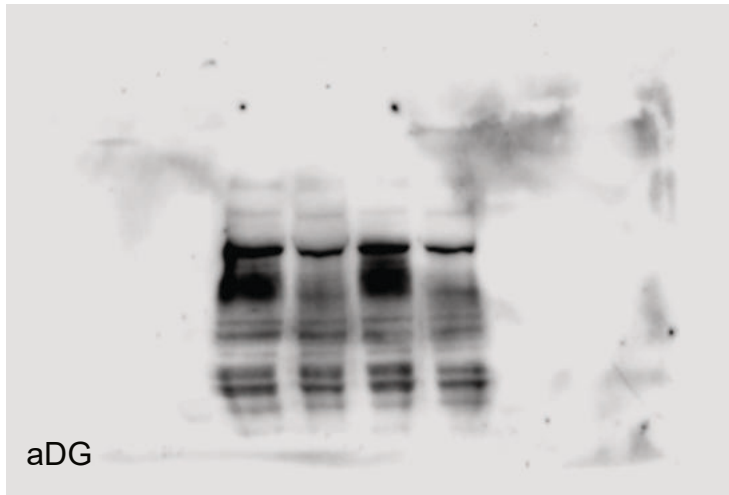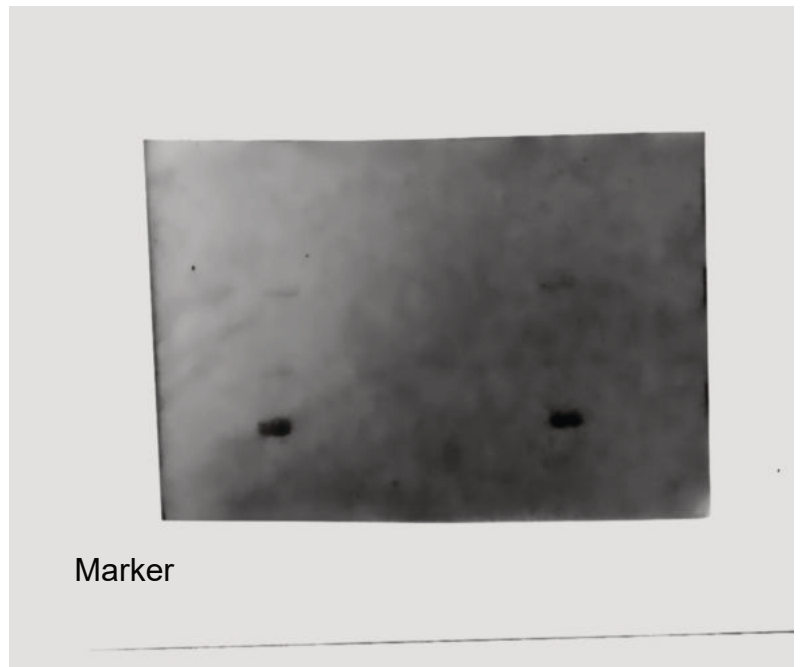

PTK7

$\beta$ -Actin

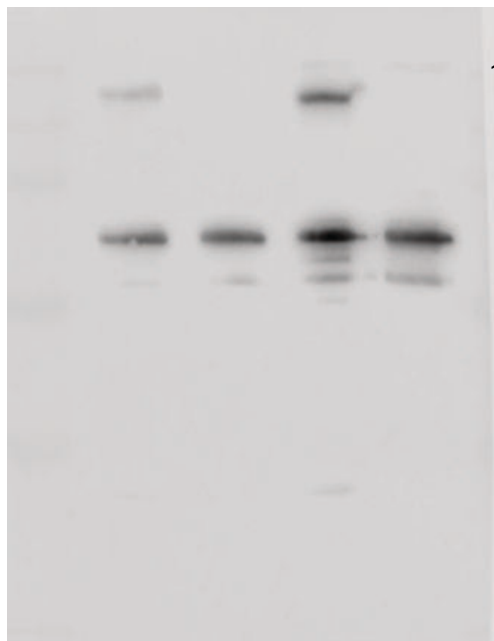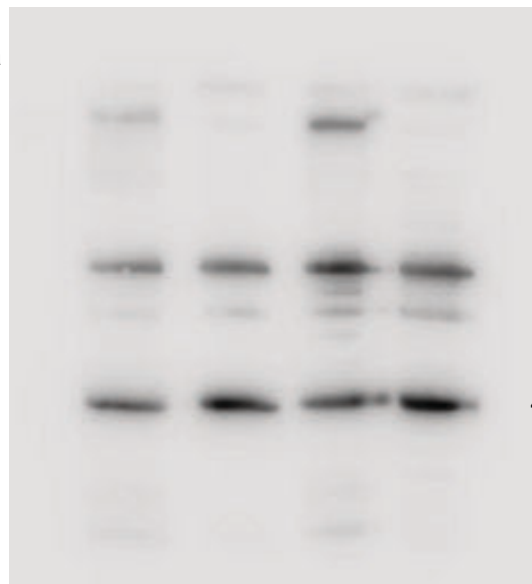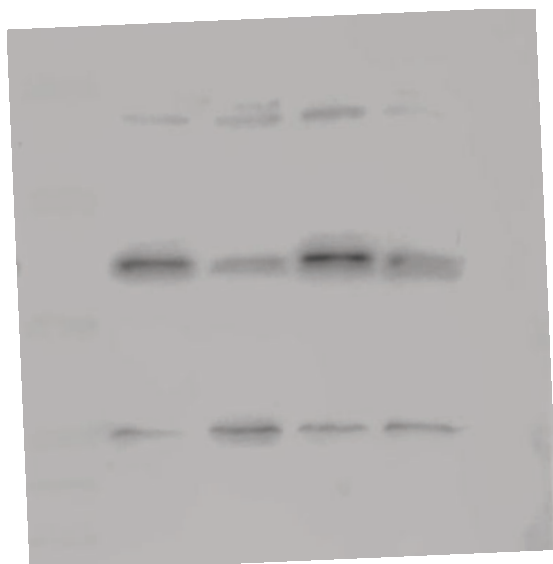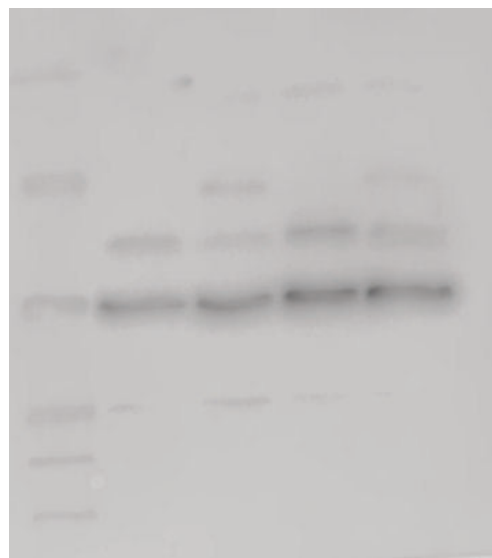

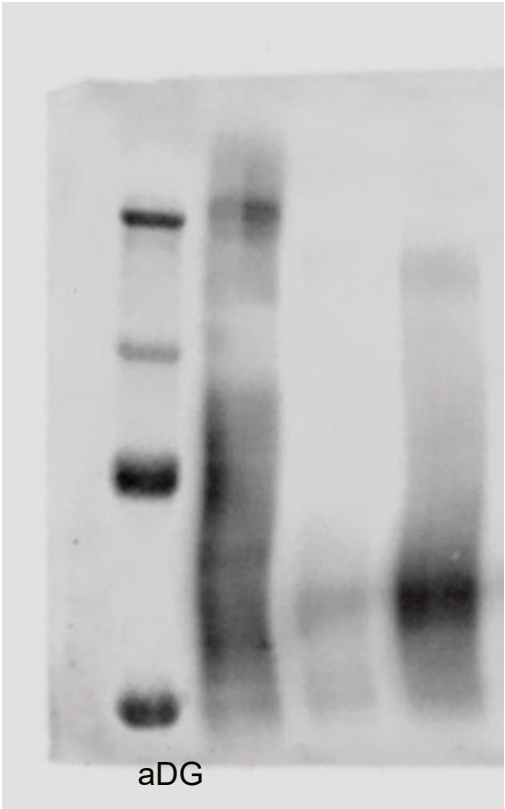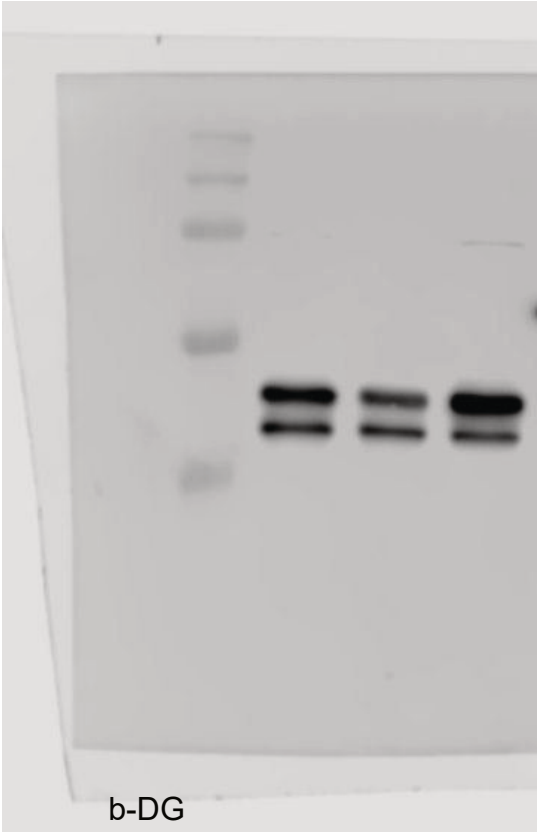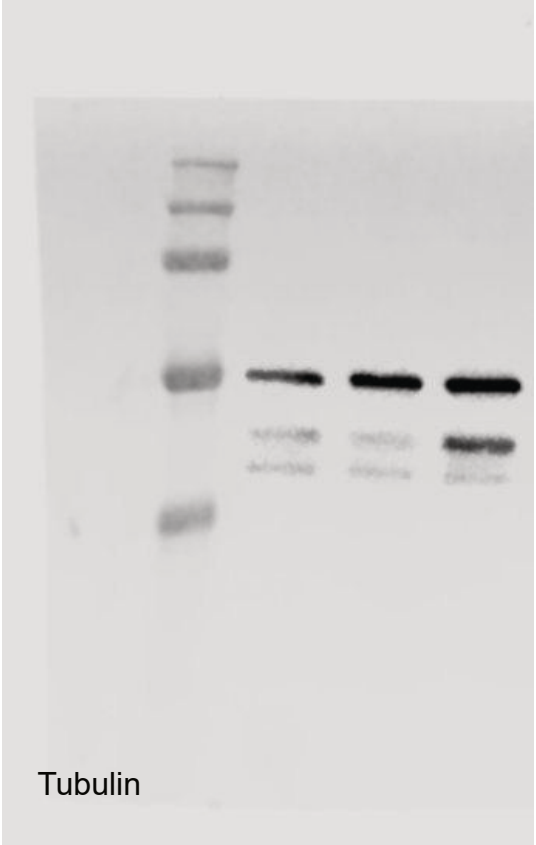

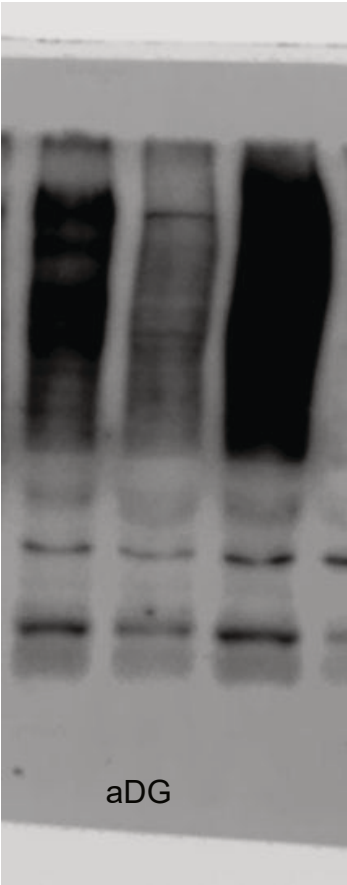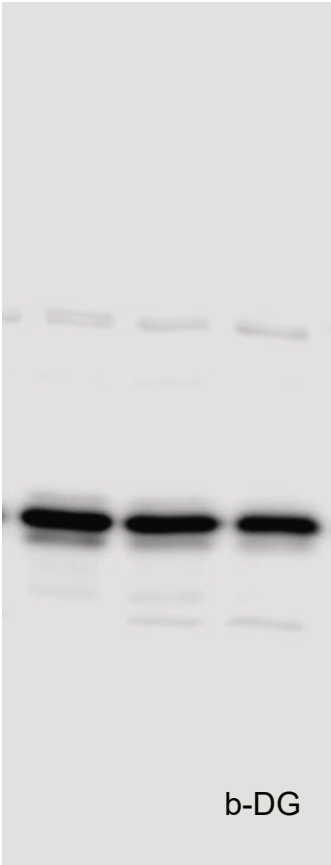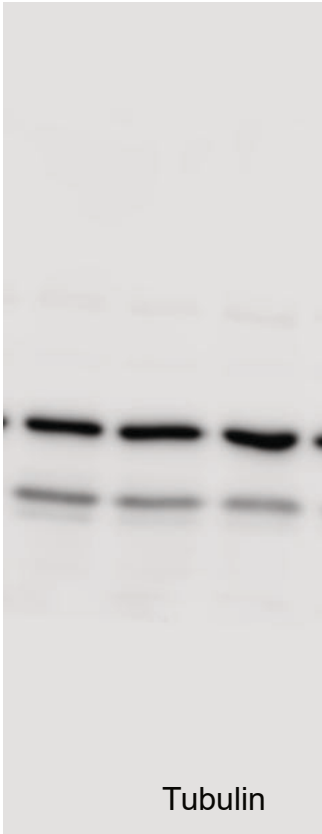

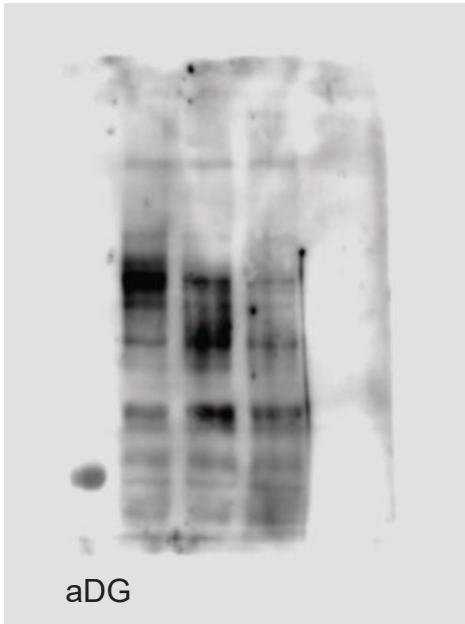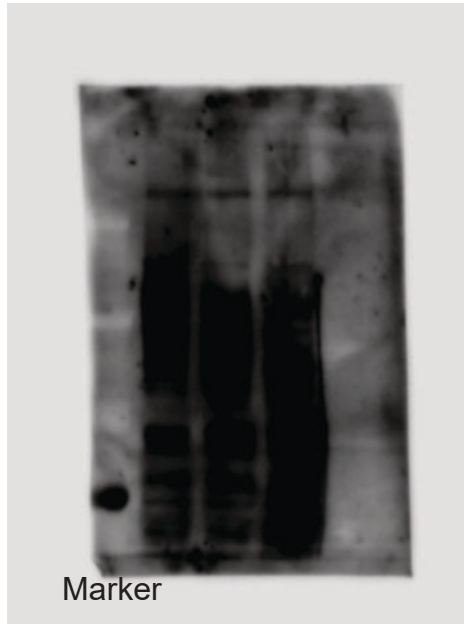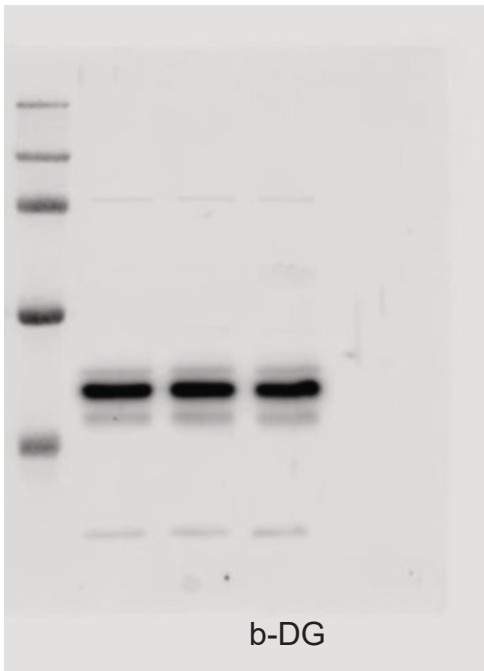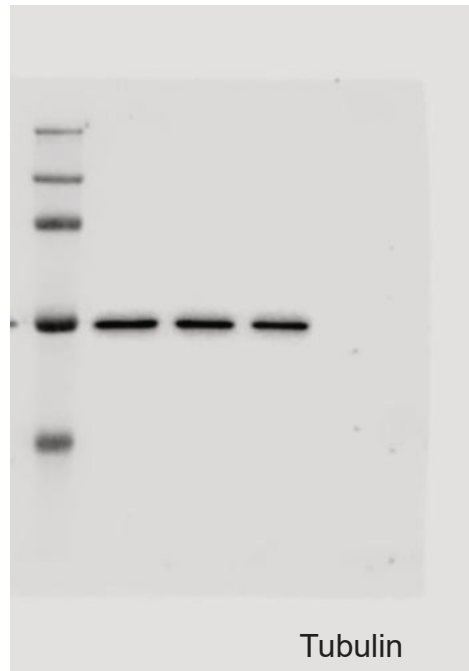

Supplement: 12964_2020_561_MOESM14_ESM.pdf [file 12964_2020_561_MOESM14_ESM.pdf]
