# Supplementary material for: Wnt-driven LARGE2 mediates laminin-adhesive O-glycosylation in human colonic epithelial cells and colorectal cancer
Source: PubMed Central journal article supplement (PMC7315491; doi:10.1186/s12964-020-00561-6), 2020-06-25
Supplement: 12964_2020_561_MOESM2_ESM.pdf [file 12964_2020_561_MOESM2_ESM.pdf]

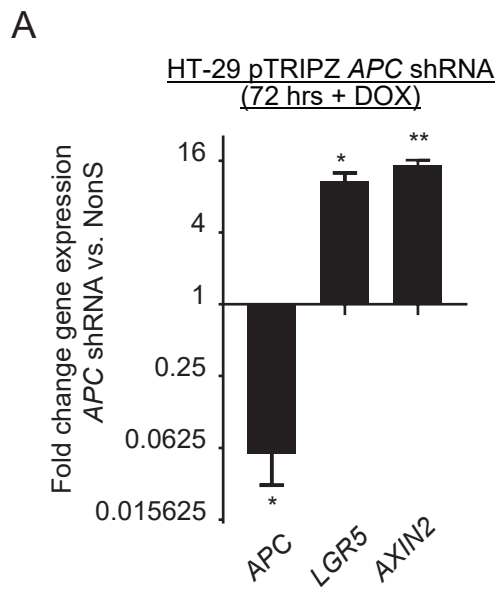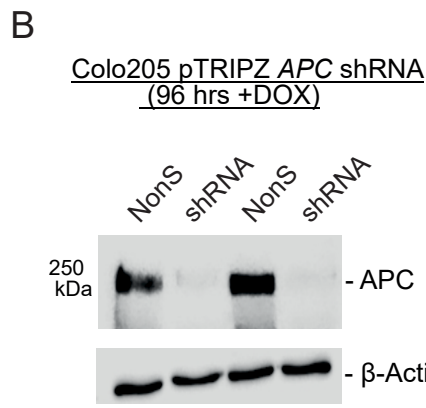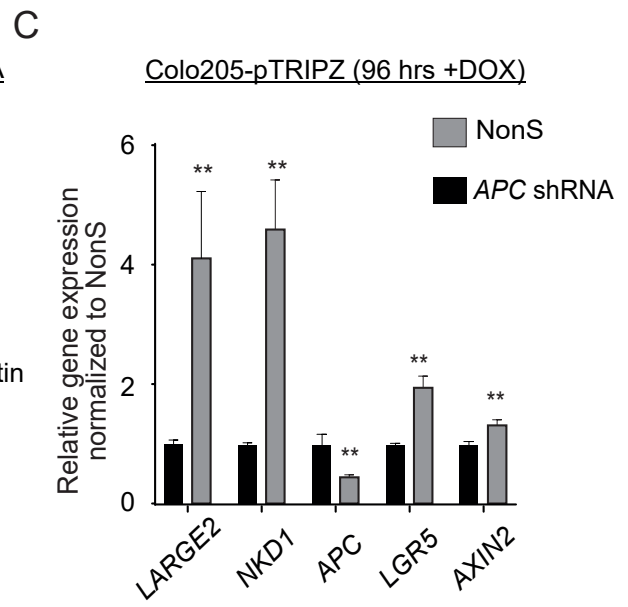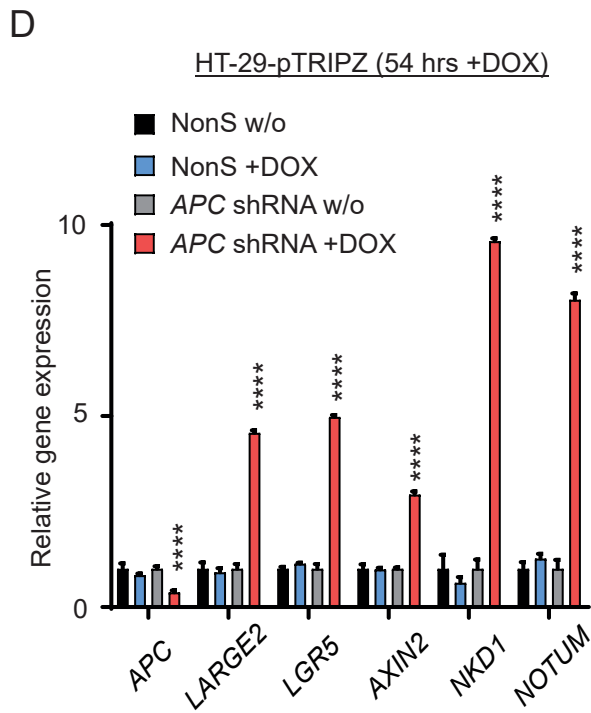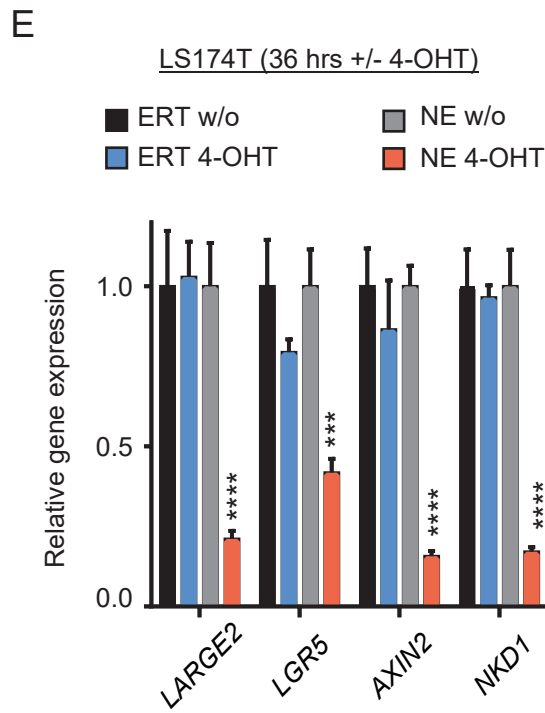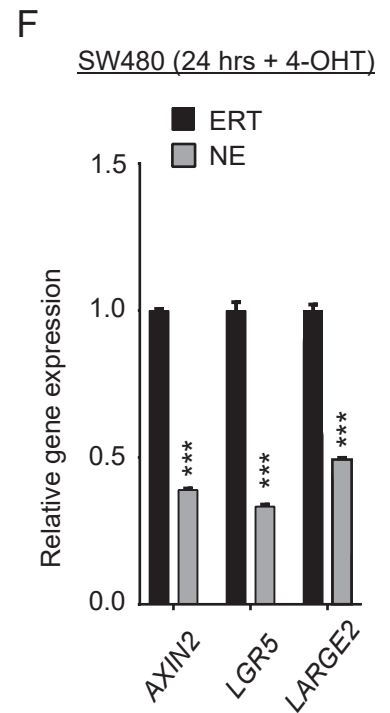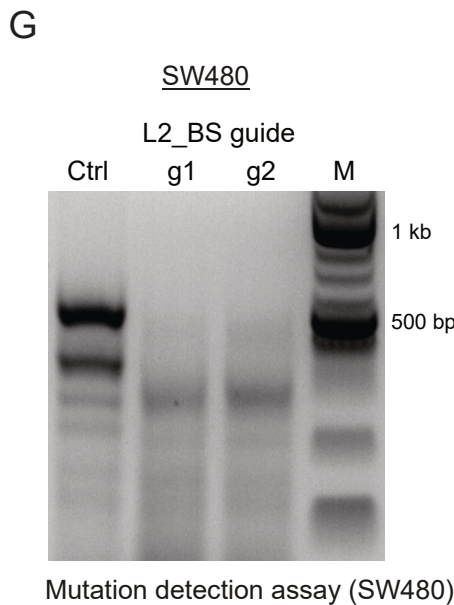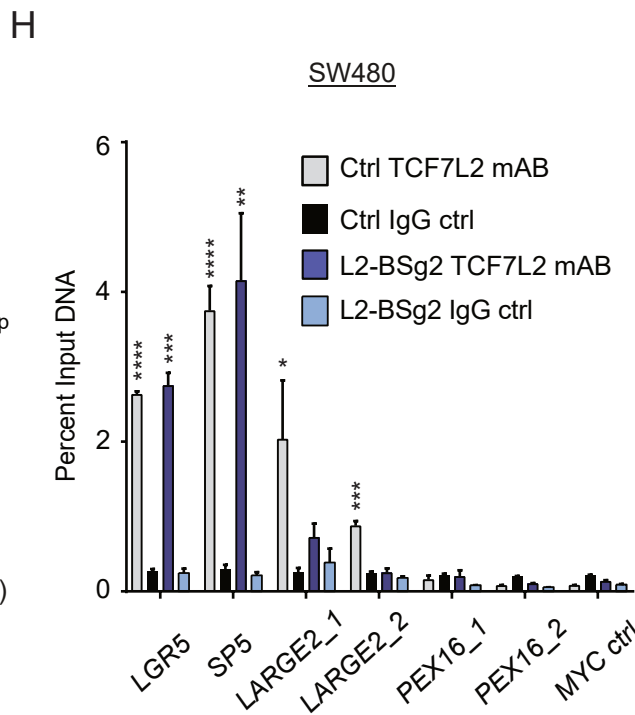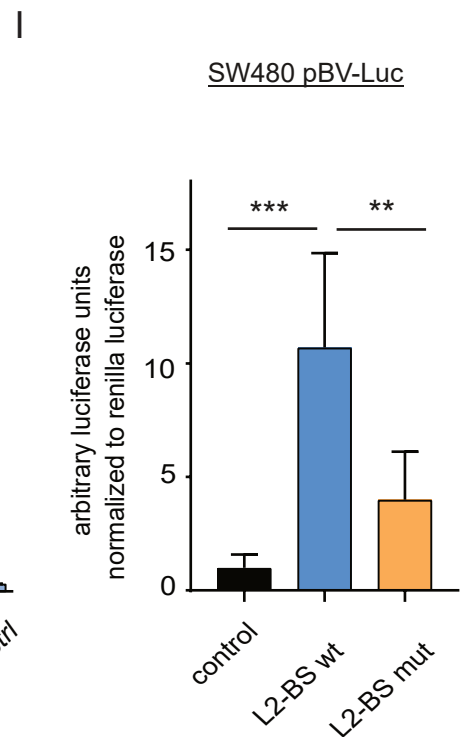

## **Additional File 2: Wnt-signaling in CRC directly stimulates expression of *LARGE2***

**A)** qRT-PCR analysis of the indicated genes in HT-29 cells expressing *APC* shRNA, compared to a non-silencing shRNA (NonS) control. Cells were treated with DOX for 72 hours. Shown are mean values  $\pm$  SD (n=3). \*  $p < 0.05$ , \*\*  $p < 0.01$ .

**B)** Immunoblot analysis of APC and  $\beta$ -actin on WCL from Colo205 cells treated with 500 ng/ml DOX to induce expression of *APC*-targeting shRNA or NonS control.

**C, D)** qRT-PCR analysis of the indicated genes in Colo205 cells (C) or HT-29 cells (D) expressing *APC*-targeting shRNA. Cells were treated with DOX for 96 and 54 hours, respectively. Mean values  $\pm$  SD (n=3) are shown. \*\*  $p < 0.01$ , \*\*\*\*  $p < 0.0001$ .

**E, F)** qRT-PCR analysis of the indicated genes in LS174T (E) or SW480 (F)-NE or -E cells, treated with 400 nM 4-OHT for 24 or 36 hours. Expression was compared to untreated cells (LS174T) or ERT control (SW480). Mean values (n=3) are depicted as mean  $\pm$  SD., \*\*\*  $p < 0.001$ , \*\*\*\*  $p < 0.0001$ .

**G)** Mutation detection assay on genomic DNA from stably transduced SW480 cell pools edited via CRISPR/Cas9 to visualize targeting of the TCF7L2\_BS (guides: g1, g2) against control (Ctrl).

**H)** qChIP analysis on genomic DNA from SW480 cells, wild-type (Ctrl) or mutant for TCF7L2\_BS (BSg2). The amount of DNA immunoprecipitated with TCF7L2 antibody or rabbit control IgG in each sample is shown as percentage of chromatin input. Results are shown as mean (n=3)  $\pm$  SD. \*  $p < 0.1$ ; \*\*  $p < 0.05$ ; \*\*\*  $p < 0.01$  \*\*\*\*  $p < 0.001$ .

**I)** Luciferase reporter assay in SW480 cells, transfected with equimolar amounts of control pBV-Luc vector, the vector containing wt or mutated TCF7L2\_BS. A Renilla luciferase vector was used as a transfection control., luciferase activity was measured 36 hrs after transfection. Results are shown as mean (n=3)  $\pm$  SD. \*\*  $p < 0.01$ , \*\*\*  $p < 0.001$ .
