# Supplementary material for: Wnt-driven LARGE2 mediates laminin-adhesive O-glycosylation in human colonic epithelial cells and colorectal cancer
Source: PubMed Central journal article supplement (PMC7315491; doi:10.1186/s12964-020-00561-6), 2020-06-25
Supplement: 12964_2020_561_MOESM3_ESM.pdf [file 12964_2020_561_MOESM3_ESM.pdf]

| Upregulated genes upon APCsilencing in HT29 cells |          |                |             |
|---------------------------------------------------|----------|----------------|-------------|
| ID                                                | Symbol   | Log2FoldChange | P-value     |
| ENSG00000140807                                   | NKD1     | 8.602580674    | 5.07E-138   |
| ENSG00000180644                                   | PRF1     | 8.481644466    | 2.5607E-06  |
| ENSG00000127863                                   | TNFRSF19 | 8.381922854    | 8.94884E-06 |
| ENSG00000064300                                   | NGFR     | 8.321646713    | 2.32444E-34 |
| ENSG00000124143                                   | ARHGAP40 | 7.726632799    | 0.00039067  |
| ENSG00000134258                                   | VTCN1    | 7.352254249    | 0.001034598 |
| ENSG00000145832                                   | SLC25A48 | 7.342235463    | 0.000578711 |
| ENSG00000212901                                   | KRTAP3-1 | 7.180547286    | 0.000121022 |
| ENSG00000185269                                   | NOTUM    | 7.137887968    | 1.71427E-80 |
| ENSG00000064692                                   | SNCAIP   | 7.008623613    | 3.5781E-12  |
| ENSG00000138316                                   | ADAMTS14 | 6.999224838    | 6.61993E-08 |
| ENSG00000158186                                   | MRAS     | 6.622524955    | 3.85009E-32 |
| ENSG00000163083                                   | INHBB    | 6.551174004    | 3.85781E-07 |
| ENSG00000177494                                   | ZBED2    | 6.379875635    | 6.19074E-06 |
| ENSG00000148677                                   | ANKRD1   | 6.200194548    | 6.24918E-06 |
| ENSG00000197859                                   | ADAMTSL2 | 6.175414322    | 1.32224E-18 |
| ENSG00000197043                                   | ANXA6    | 6.104449376    | 2.06357E-21 |
| ENSG00000100593                                   | ISM2     | 5.343365055    | 0.001073581 |
| ENSG00000113657                                   | DPYSL3   | 5.201070519    | 2.62272E-33 |
| ENSG00000119699                                   | TGFB3    | 5.039346591    | 8.62959E-57 |
| ENSG00000123405                                   | NFE2     | 4.945992665    | 6.02359E-07 |
| ENSG00000078814                                   | MYH7B    | 4.884545828    | 4.09181E-37 |
| ENSG00000064195                                   | DLX3     | 4.873296004    | 0.002726643 |
| ENSG00000115596                                   | WNT6     | 4.865668666    | 5.41317E-11 |
| ENSG00000155265                                   | GOLGA7B  | 4.686729917    | 1.09649E-19 |
| ENSG00000198756                                   | COLGALT2 | 4.604941281    | 1.26313E-05 |
| ENSG00000204542                                   | C6orf15  | 4.440122934    | 3.0326E-07  |
| ENSG00000110944                                   | IL23A    | 4.40418074     | 9.87462E-13 |
| ENSG00000204335                                   | SP5      | 4.39226625     | 4.84127E-47 |
| ENSG00000143147                                   | GPR161   | 4.292967804    | 3.69664E-07 |
| ENSG00000152229                                   | PSTPIP2  | 4.282150543    | 8.3572E-08  |
| ENSG00000156574                                   | NODAL    | 4.268636635    | 0.003580412 |
| ENSG00000163864                                   | NMNAT3   | 4.21450204     | 0.002788397 |
| ENSG00000125872                                   | LRRN4    | 4.207032154    | 0.00033826  |
| ENSG00000165905                                   | LARGE2   | 4.197424998    | 5.83497E-45 |
| ENSG00000151790                                   | TDO2     | 4.16177928     | 0.000419467 |
| ENSG00000116661                                   | FBXO2    | 4.05579249     | 4.80261E-08 |
| ENSG00000162849                                   | KIF26B   | 4.052303237    | 3.59831E-13 |
| ENSG00000137285                                   | TUBB2B   | 4.024336319    | 3.04917E-06 |
| ENSG00000167552                                   | TUBA1A   | 3.965094734    | 7.98863E-28 |
| ENSG00000117115                                   | PADI2    | 3.940615361    | 1.57694E-08 |
| ENSG00000112394                                   | SLC16A10 | 3.916210132    | 1.40886E-12 |
| ENSG00000144369                                   | FAM171B  | 3.849232996    | 0.000164772 |
| ENSG00000165655                                   | ZNF503   | 3.828123892    | 7.26616E-15 |
| ENSG00000162946                                   | DISC1    | 3.755136404    | 0.009135817 |
| ENSG00000129757                                   | CDKN1C   | 3.74413193     | 2.72437E-35 |
| ENSG00000183734                                   | ASCL2    | 3.722809306    | 4.91022E-24 |
| ENSG00000102760                                   | RGCC     | 3.684684589    | 2.2452E-09  |

Table S1

| Upregulated genes upon APCsilencing in HT29 cells |          |                |             |
|---------------------------------------------------|----------|----------------|-------------|
| ID                                                | Symbol   | Log2FoldChange | P-value     |
| ENSG00000133067                                   | LGR6     | 3.637082803    | 3.49356E-06 |
| ENSG00000167749                                   | KLK4     | 3.605832569    | 0.002691095 |
| ENSG00000071909                                   | MYO3B    | 3.597653095    | 0.002212787 |
| ENSG00000029534                                   | ANK1     | 3.5578801      | 0.000173627 |
| ENSG00000111752                                   | PHC1     | 3.546166766    | 0.000844523 |
| ENSG00000064201                                   | TSPAN32  | 3.54102919     | 6.40192E-07 |
| ENSG00000148468                                   | FAM171A1 | 3.478764572    | 0.000384652 |
| ENSG00000198624                                   | CCDC69   | 3.464214531    | 3.06696E-09 |
| ENSG00000150687                                   | PRSS23   | 3.461033515    | 2.60602E-16 |
| ENSG00000168386                                   | FILIP1L  | 3.442487888    | 7.92087E-17 |
| ENSG00000031081                                   | ARHGAP31 | 3.426654038    | 0.001629129 |
| ENSG00000165617                                   | DACT1    | 3.394963271    | 0.000197769 |
| ENSG00000085741                                   | WNT11    | 3.32992985     | 1.22088E-22 |
| ENSG00000163121                                   | NEURL3   | 3.329803638    | 0.000236394 |
| ENSG00000147251                                   | DOCK11   | 3.318623723    | 8.45706E-05 |
| ENSG00000095637                                   | SORBS1   | 3.31779005     | 1.59136E-23 |
| ENSG00000188042                                   | ARL4C    | 3.316025619    | 1.46794E-14 |
| ENSG00000175928                                   | LRRN1    | 3.303454395    | 5.05584E-11 |
| ENSG00000126778                                   | SIX1     | 3.301510078    | 0.002900928 |
| ENSG00000204334                                   | ERICH2   | 3.247816973    | 2.84284E-09 |
| ENSG00000128683                                   | GAD1     | 3.211539088    | 1.25221E-32 |
| ENSG00000100027                                   | YPEL1    | 3.18204982     | 3.41329E-08 |
| ENSG00000184194                                   | GPR173   | 3.171113232    | 7.23216E-07 |
| ENSG00000102904                                   | TSNAXIP1 | 3.144329626    | 0.005409629 |
| ENSG00000183087                                   | GAS6     | 3.141731259    | 2.76034E-09 |
| ENSG00000168874                                   | ATOH8    | 3.118922279    | 8.33337E-17 |
| ENSG00000163827                                   | LRRC2    | 3.092973605    | 3.04917E-06 |
| ENSG00000168734                                   | PKIG     | 3.090403583    | 9.74932E-08 |
| ENSG00000009709                                   | PAX7     | 3.066677122    | 0.00143994  |
| ENSG00000084731                                   | KIF3C    | 3.054514743    | 2.83417E-16 |
| ENSG00000112655                                   | PTK7     | 3.042764083    | 3.65551E-32 |
| ENSG00000124006                                   | OBSL1    | 3.032608588    | 1.37319E-08 |
| ENSG00000133216                                   | EPHB2    | 3.025010537    | 2.48081E-18 |
| ENSG00000110665                                   | C11orf21 | 3.017208357    | 2.07063E-05 |
| ENSG00000204869                                   | IGFL4    | 3.010297975    | 1.86142E-16 |
| ENSG00000196628                                   | TCF4     | 2.992163119    | 0.00385821  |
| ENSG00000095585                                   | BLNK     | 2.973615163    | 7.28056E-07 |
| ENSG00000041982                                   | TNC      | 2.963289114    | 9.9644E-15  |
| ENSG00000160360                                   | GPSM1    | 2.958637938    | 3.39779E-07 |
| ENSG00000168646                                   | AXIN2    | 2.931950773    | 7.96337E-17 |
| ENSG00000204889                                   | KRT40    | 2.92242472     | 1.13206E-11 |
| ENSG00000257108                                   | NHLRC4   | 2.919886562    | 0.00016286  |
| ENSG00000117122                                   | MFAP2    | 2.885982335    | 2.84641E-07 |
| ENSG00000171992                                   | SYNPO    | 2.877004173    | 0.00011893  |
| ENSG00000143507                                   | DUSP10   | 2.868366206    | 0.000457202 |
| ENSG00000204624                                   | DISP3    | 2.862716261    | 0.000296572 |
| ENSG00000184160                                   | ADRA2C   | 2.852390745    | 0.002113912 |
| ENSG00000180340                                   | FZD2     | 2.833675814    | 2.05044E-16 |

Table S1

| Upregulated genes upon APCsilencing in HT29 cells |         |                |             |
|---------------------------------------------------|---------|----------------|-------------|
| ID                                                | Symbol  | Log2FoldChange | P-value     |
| ENSG00000171243                                   | SOSTDC1 | 2.810092241    | 3.19949E-23 |
| ENSG00000117707                                   | PROX1   | 2.793511856    | 8.67569E-07 |
| ENSG00000131370                                   | SH3BP5  | 2.791407584    | 0.000474945 |
| ENSG00000143434                                   | SEMA6C  | 2.790280368    | 0.0001192   |
| ENSG00000101335                                   | MYL9    | 2.777647736    | 6.45636E-06 |
| ENSG00000135363                                   | LMO2    | 2.764288942    | 0.003483693 |
| ENSG00000115594                                   | IL1R1   | 2.76248358     | 0.004557431 |
| ENSG00000182871                                   | COL18A1 | 2.74042344     | 2.77553E-17 |
| ENSG00000142619                                   | PADI3   | 2.737690058    | 0.004458667 |
| ENSG00000172478                                   | MAB21L4 | 2.735828425    | 1.09649E-19 |
| ENSG00000104894                                   | CD37    | 2.735828155    | 1.10466E-14 |
| ENSG00000122877                                   | EGR2    | 2.708316516    | 0.009307563 |
| ENSG0000019582                                    | CD74    | 2.705479177    | 1.52701E-09 |
| ENSG00000091986                                   | CCDC80  | 2.69957609     | 0.000619674 |
| ENSG00000108984                                   | MAP2K6  | 2.688239526    | 8.05242E-11 |
| ENSG00000139438                                   | FAM222A | 2.67794095     | 1.74346E-23 |
| ENSG00000102575                                   | ACP5    | 2.672046472    | 0.000558537 |
| ENSG00000149582                                   | TMEM25  | 2.659356818    | 2.17762E-10 |
| ENSG00000103528                                   | SYT17   | 2.639570346    | 2.01009E-06 |
| ENSG00000143845                                   | ETNK2   | 2.625577523    | 0.003641957 |
| ENSG00000154330                                   | PGM5    | 2.616409747    | 0.001003871 |
| ENSG00000183496                                   | MEX3B   | 2.611344848    | 1.09334E-10 |
| ENSG00000126016                                   | AMOT    | 2.602540881    | 0.006145696 |
| ENSG00000117519                                   | CNN3    | 2.600542605    | 1.83357E-11 |
| ENSG00000099953                                   | MMP11   | 2.59143253     | 2.98609E-07 |
| ENSG00000108244                                   | KRT23   | 2.590662348    | 9.83632E-08 |
| ENSG00000161905                                   | ALOX15  | 2.587618361    | 0.000143857 |
| ENSG00000132688                                   | NES     | 2.584793887    | 6.90885E-09 |
| ENSG00000101470                                   | TNNC2   | 2.568570131    | 0.000432026 |
| ENSG00000163520                                   | FBLN2   | 2.564563751    | 0.004836259 |
| ENSG00000183762                                   | KREMEN1 | 2.549802574    | 6.70806E-16 |
| ENSG00000166922                                   | SCG5    | 2.546627877    | 6.6952E-05  |
| ENSG00000188322                                   | SBK1    | 2.543519313    | 1.22283E-13 |
| ENSG00000105419                                   | MEIS3   | 2.530128635    | 6.47875E-05 |
| ENSG00000063127                                   | SLC6A16 | 2.519070448    | 2.99704E-05 |
| ENSG00000181264                                   | TMEM136 | 2.504199737    | 6.85683E-08 |
| ENSG00000213626                                   | LBH     | 2.502892271    | 0.000146655 |
| ENSG00000198892                                   | SHISA4  | 2.501549142    | 1.07846E-08 |
| ENSG00000165556                                   | CDX2    | 2.49611389     | 6.30181E-05 |
| ENSG00000189431                                   | RASSF10 | 2.491266557    | 1.22088E-22 |
| ENSG00000211445                                   | GPX3    | 2.471672355    | 2.04807E-11 |
| ENSG00000171608                                   | PIK3CD  | 2.468556942    | 0.002541775 |
| ENSG00000198933                                   | TBKBP1  | 2.441221912    | 6.36429E-05 |
| ENSG00000275896                                   | PRSS2   | 2.437012862    | 0.001946202 |
| ENSG00000102547                                   | CAB39L  | 2.434804025    | 8.97604E-15 |
| ENSG00000170961                                   | HAS2    | 2.428882219    | 1.74429E-12 |
| ENSG00000204950                                   | LRRC10B | 2.426935758    | 2.52172E-05 |
| ENSG00000158806                                   | NPM2    | 2.420042041    | 7.50019E-05 |

Table S1

Table S1

Page 4

| Upregulated genes upon APCsilencing in HT29 cells |          |                |             |
|---------------------------------------------------|----------|----------------|-------------|
| ID                                                | Symbol   | Log2FoldChange | P-value     |
| ENSG00000132879                                   | FBXO44   | 2.417558565    | 1.91066E-07 |
| ENSG00000121653                                   | MAPK8IP1 | 2.415395945    | 0.000980426 |
| ENSG00000113758                                   | DBN1     | 2.411098491    | 9.59595E-22 |
| ENSG00000157657                                   | ZNF618   | 2.411002884    | 2.35336E-09 |
| ENSG00000104081                                   | BMF      | 2.409065176    | 7.38962E-10 |
| ENSG00000106038                                   | EVX1     | 2.404276472    | 0.005753646 |
| ENSG0000010610                                    | CD4      | 2.401196396    | 0.00569163  |
| ENSG00000115112                                   | TFCP2L1  | 2.39758356     | 0.000357533 |
| ENSG00000142102                                   | PGGHG    | 2.380906046    | 5.78566E-10 |
| ENSG00000100167                                   | SEPT3    | 2.36881409     | 1.00614E-06 |
| ENSG00000196132                                   | MYT1     | 2.361588613    | 1.37548E-08 |
| ENSG00000198417                                   | MT1F     | 2.353046319    | 0.000115224 |
| ENSG00000074219                                   | TEAD2    | 2.34953883     | 1.45765E-22 |
| ENSG00000187867                                   | PALM3    | 2.347467371    | 4.84483E-05 |
| ENSG00000115507                                   | OTX1     | 2.346138687    | 1.58276E-14 |
| ENSG00000153982                                   | GDPD1    | 2.327746041    | 0.002212787 |
| ENSG00000160094                                   | ZNF362   | 2.322680725    | 9.52382E-07 |
| ENSG00000136425                                   | CIB2     | 2.320749105    | 0.000914162 |
| ENSG00000148735                                   | PLEKHS1  | 2.310077032    | 0.008428761 |
| ENSG00000134369                                   | NAV1     | 2.301752102    | 1.44696E-15 |
| ENSG00000051128                                   | HOMER3   | 2.282075188    | 2.45594E-08 |
| ENSG00000151692                                   | RNF144A  | 2.279505344    | 0.002603459 |
| ENSG00000130203                                   | APOE     | 2.275983404    | 0.009261498 |
| ENSG00000118503                                   | TNFAIP3  | 2.257376577    | 0.000315389 |
| ENSG00000205809                                   | KLRC2    | 2.255839488    | 3.85097E-06 |
| ENSG00000274180                                   | NATD1    | 2.255663375    | 3.21337E-12 |
| ENSG00000124216                                   | SNAI1    | 2.24513706     | 1.11904E-08 |
| ENSG00000136490                                   | LIMD2    | 2.240971365    | 2.38335E-05 |
| ENSG00000152127                                   | MGAT5    | 2.225072899    | 8.48299E-19 |
| ENSG00000071242                                   | RPS6KA2  | 2.222406752    | 0.000722787 |
| ENSG00000239521                                   | CASTOR3  | 2.219900967    | 1.82282E-10 |
| ENSG00000072195                                   | SPEG     | 2.218425372    | 2.26897E-05 |
| ENSG00000124766                                   | SOX4     | 2.213864709    | 2.17609E-10 |
| ENSG00000188766                                   | SPRED3   | 2.206324049    | 6.79374E-07 |
| ENSG00000131016                                   | AKAP12   | 2.204023016    | 0.000188395 |
| ENSG00000063438                                   | AHRR     | 2.193565987    | 6.80346E-13 |
| ENSG00000137747                                   | TMPRSS13 | 2.170903868    | 2.67881E-06 |
| ENSG00000103196                                   | CRISPLD2 | 2.162996232    | 8.22421E-07 |
| ENSG00000204175                                   | GPRIN2   | 2.159399292    | 0.000474945 |
| ENSG00000131069                                   | ACSS2    | 2.152287347    | 1.49227E-06 |
| ENSG00000163739                                   | CXCL1    | 2.150080138    | 3.64392E-05 |
| ENSG00000143365                                   | RORC     | 2.13972522     | 0.000720656 |
| ENSG00000253731                                   | PCDHGA6  | 2.128621178    | 0.000238468 |
| ENSG00000075618                                   | FSCN1    | 2.125086149    | 2.98259E-07 |
| ENSG00000213420                                   | GPC2     | 2.120444946    | 9.981E-10   |
| ENSG00000123453                                   | SARDH    | 2.113210171    | 0.000417309 |
| ENSG00000184489                                   | PTP4A3   | 2.103496554    | 6.87894E-07 |
| ENSG00000035862                                   | TIMP2    | 2.094519745    | 0.000296572 |

| <b>Upregulated genes upon APCsilencing in HT29 cells</b> |               |                       |                |
|----------------------------------------------------------|---------------|-----------------------|----------------|
| <b>ID</b>                                                | <b>Symbol</b> | <b>Log2FoldChange</b> | <b>P-value</b> |
| ENSG00000012171                                          | SEMA3B        | 2.088360455           | 5.68105E-05    |
| ENSG00000140465                                          | CYP1A1        | 2.080720471           | 0.002706239    |
| ENSG00000116990                                          | MYCL          | 2.074421811           | 4.44412E-10    |
| ENSG00000160469                                          | BRSK1         | 2.070683199           | 0.002428153    |
| ENSG00000120885                                          | CLU           | 2.067374314           | 6.87953E-06    |
| ENSG00000261934                                          | PCDHGA9       | 2.056268865           | 0.000159151    |
| ENSG00000171160                                          | MORN4         | 2.055049554           | 0.000261555    |
| ENSG00000139629                                          | GALNT6        | 2.054137238           | 1.17241E-08    |
| ENSG00000163545                                          | NUAK2         | 2.035949841           | 2.19135E-06    |
| ENSG00000145730                                          | PAM           | 2.032630978           | 9.64538E-06    |
| ENSG00000184254                                          | ALDH1A3       | 2.030614696           | 8.29048E-07    |
| ENSG00000105767                                          | CADM4         | 2.015480314           | 2.01783E-11    |
| ENSG00000089820                                          | ARHGAP4       | 2.009226032           | 0.000333205    |

Table S1

| Downregulated genes upon APC silencing in HT29 cells |           |                |            |
|------------------------------------------------------|-----------|----------------|------------|
| ID                                                   | Symbol    | Log2FoldChange | P-value    |
| ENSG00000198088                                      | NUP62CL   | -2.006185198   | 3.4289E-10 |
| ENSG00000115598                                      | IL1RL2    | -2.006756954   | 0.00013471 |
| ENSG00000124107                                      | SLPI      | -2.021179432   | 0.00023257 |
| ENSG00000123095                                      | BHLHE41   | -2.031026674   | 3.5027E-07 |
| ENSG00000123219                                      | CENPK     | -2.032463983   | 0.00072009 |
| ENSG00000205213                                      | LGR4      | -2.05210898    | 1.248E-06  |
| ENSG00000186204                                      | CYP4F12   | -2.066840146   | 0.00434523 |
| ENSG00000152078                                      | TMEM56    | -2.067651651   | 0.00208772 |
| ENSG00000026103                                      | FAS       | -2.072048824   | 6.0608E-05 |
| ENSG00000104537                                      | ANXA13    | -2.075074554   | 1.0916E-06 |
| ENSG00000241635                                      | UGT1A1    | -2.079250848   | 1.1087E-07 |
| ENSG00000114771                                      | AADAC     | -2.083743961   | 0.004211   |
| ENSG00000107159                                      | CA9       | -2.084701827   | 0.00931087 |
| ENSG00000198826                                      | ARHGAP11A | -2.084857509   | 0.00460269 |
| ENSG00000074410                                      | CA12      | -2.101949805   | 4.4908E-16 |
| ENSG00000173546                                      | CSPG4     | -2.109983033   | 8.0572E-09 |
| ENSG00000162433                                      | AK4       | -2.128488392   | 7.8118E-10 |
| ENSG00000178202                                      | KDELC2    | -2.139889178   | 2.0099E-08 |
| ENSG00000164749                                      | HNF4G     | -2.146519604   | 0.00081192 |
| ENSG00000188993                                      | LRRC66    | -2.153379701   | 0.00026197 |
| ENSG00000215182                                      | MUC5AC    | -2.167181039   | 6.9308E-06 |
| ENSG00000197408                                      | CYP2B6    | -2.203119081   | 0.00020792 |
| ENSG00000242366                                      | UGT1A8    | -2.206275932   | 5.0558E-11 |
| ENSG00000116741                                      | RGS2      | -2.215301069   | 1.4782E-07 |
| ENSG00000171227                                      | TMEM37    | -2.229916037   | 0.00417401 |
| ENSG00000115339                                      | GALNT3    | -2.230594674   | 1.4968E-07 |
| ENSG00000147255                                      | IGSF1     | -2.238710903   | 2.3819E-07 |
| ENSG00000170345                                      | FOS       | -2.250174125   | 1.0629E-13 |
| ENSG00000146477                                      | SLC22A3   | -2.254319106   | 1.6815E-07 |
| ENSG00000000971                                      | CFH       | -2.257842011   | 2.1589E-11 |
| ENSG00000106384                                      | MOGAT3    | -2.258620267   | 3.7738E-08 |
| ENSG00000091409                                      | ITGA6     | -2.265340956   | 3.478E-10  |
| ENSG00000204219                                      | TCEA3     | -2.275625015   | 0.00152552 |
| ENSG00000173467                                      | AGR3      | -2.283912139   | 0.0001692  |
| ENSG00000114248                                      | LRRC31    | -2.288037427   | 0.00122413 |
| ENSG00000120162                                      | MOB3B     | -2.288686024   | 5.4254E-11 |
| ENSG00000102678                                      | FGF9      | -2.318020532   | 6.5843E-05 |
| ENSG00000138193                                      | PLCE1     | -2.329875062   | 8.9488E-06 |
| ENSG00000138587                                      | MNS1      | -2.365373138   | 0.00720807 |
| ENSG00000167653                                      | PSCA      | -2.397682868   | 2.4519E-05 |
| ENSG00000118507                                      | AKAP7     | -2.407044271   | 0.00087028 |
| ENSG00000134827                                      | TCN1      | -2.416574065   | 2.6148E-10 |
| ENSG00000133710                                      | SPINK5    | -2.425098096   | 0.00043503 |
| ENSG00000105388                                      | CEACAM5   | -2.467999365   | 3.4083E-09 |
| ENSG00000100314                                      | CABP7     | -2.523521783   | 2.0009E-05 |
| ENSG00000152952                                      | PLOD2     | -2.632761361   | 5.6929E-19 |
| ENSG00000117983                                      | MUC5B     | -2.653682274   | 0.00616753 |
| ENSG00000141469                                      | SLC14A1   | -2.668382689   | 0.00185439 |

Table S1

Table S1

Page 7

| Downregulated genes upon APCsilencing in HT29 cells |         |                |             |
|-----------------------------------------------------|---------|----------------|-------------|
| ID                                                  | Symbol  | Log2FoldChange | P-value     |
| ENSG00000113722                                     | CDX1    | -2.698645974   | 1.94856E-05 |
| ENSG00000122711                                     | SPINK4  | -2.700559365   | 3.58457E-06 |
| ENSG00000119547                                     | ONECUT2 | -2.729203198   | 0.000153515 |
| ENSG00000113810                                     | SMC4    | -2.729782991   | 0.009922356 |
| ENSG00000089472                                     | HEPH    | -2.74079466    | 1.47848E-08 |
| ENSG00000170381                                     | SEMA3E  | -2.835390646   | 0.00385821  |
| ENSG00000144908                                     | ALDH1L1 | -2.835966044   | 0.000524337 |
| ENSG00000169903                                     | TM4SF4  | -2.840114878   | 3.37385E-19 |
| ENSG00000160182                                     | TFF1    | -2.908342635   | 3.04917E-06 |
| ENSG00000166268                                     | MYRFL   | -2.914247816   | 7.57632E-08 |
| ENSG00000198074                                     | AKR1B10 | -2.954632835   | 9.11808E-06 |
| ENSG00000134193                                     | REG4    | -2.993730651   | 4.82183E-11 |
| ENSG00000166866                                     | MYO1A   | -3.02585455    | 9.63104E-06 |
| ENSG00000134240                                     | HMGCS2  | -3.037652515   | 1.55228E-13 |
| ENSG00000137812                                     | KNL1    | -3.051531887   | 0.004746811 |
| ENSG00000079112                                     | CDH17   | -3.055435635   | 1.31586E-07 |
| ENSG00000163535                                     | SGO2    | -3.083993555   | 0.006059521 |
| ENSG00000100079                                     | LGALS2  | -3.161472673   | 7.78364E-05 |
| ENSG00000172367                                     | PDZD3   | -3.205250786   | 6.62701E-12 |
| ENSG00000109511                                     | ANXA10  | -3.205507355   | 2.01361E-13 |
| ENSG00000086696                                     | HSD17B2 | -3.236828004   | 3.98721E-18 |
| ENSG00000186529                                     | CYP4F3  | -3.304182262   | 0.000248439 |
| ENSG00000145703                                     | IQGAP2  | -3.314736975   | 4.27194E-06 |
| ENSG00000189057                                     | FAM111B | -3.354555064   | 0.003436299 |
| ENSG00000271447                                     | MMP28   | -3.416765137   | 3.09847E-05 |
| ENSG00000138182                                     | KIF20B  | -3.530266008   | 0.000744477 |
| ENSG00000144674                                     | GOLGA4  | -3.53627402    | 0.003724917 |
| ENSG00000138778                                     | CENPE   | -3.550466004   | 0.000674683 |
| ENSG00000143167                                     | GPA33   | -3.560943471   | 7.3413E-12  |
| ENSG00000139618                                     | BRCA2   | -3.564595641   | 0.001629129 |
| ENSG00000134982                                     | APC     | -3.583939355   | 0.003499252 |
| ENSG00000122483                                     | CCDC18  | -3.586350221   | 0.000395594 |
| ENSG00000163586                                     | FABP1   | -4.618716727   | 0.002603459 |
| ENSG00000142484                                     | TM4SF5  | -4.946250774   | 0.007826525 |

### **Additional file 3: RNA Seq analysis after conditional silencing of APC in stably transduced HT-29 cells**

HT-29 colorectal cancer cells were stably transduced with lentiviral particles encoding for a doxycycline-inducible shRNA targeting APC or, as a control, a non-silencing (NonS) shRNA. 72 hours after treatment with 500 ng/ml doxycycline, cells were harvested for RNA isolation. Next generation sequencing (RNA Seq) was performed as described in the Materials and Methods section. Shown is the DeSeq2 output file after contrasting biological duplicates of HT-29 APC shRNA1 versus HT-29 NonS shRNA samples. Positive fold changes indicate elevated gene expression 72 hours after silencing of APC. Significance is indicated as the adjusted p-value. A cut-off was defined as fold-change > 4 and adjusted p-value < 0.01, as described in the main manuscript.
