# Supplementary material for: Wnt-driven LARGE2 mediates laminin-adhesive O-glycosylation in human colonic epithelial cells and colorectal cancer
Source: PubMed Central journal article supplement (PMC7315491; doi:10.1186/s12964-020-00561-6), 2020-06-25
Supplement: 12964_2020_561_MOESM5_ESM.pdf [file 12964_2020_561_MOESM5_ESM.pdf]

**Table S2\_PDOand PDO panel**  
relates to Manuscript Figures 4, 5, and 7

**Informations on the patient-derived (tumor) organoid models used in this study**

Information on primary tissue-derived benign human colorectal organoids

| ID        | tissue origin                    | patient background |
|-----------|----------------------------------|--------------------|
| NM1 /PDO1 | colonic mucosa (colon ascendens) | CRC                |
| NM2 /PDO2 | rectal mucosa                    | CRC                |
| NM3 /PDO3 | caecal mucosa                    | CRC                |
| NM4 /PDO4 | colonic mucosa (colon ascendens) | CRC                |

Information on CRC-derived tumor organoids (PDO: Patient-derived tumor organoid)

| ID     | tissue origin    | location of primary tumor | diagnosis(M0/M1) at surgery (no follow up) | MSI/MSS status | KRASvariant | NRASvariant | BRAFvariant | PIK3CAvariant |
|--------|------------------|---------------------------|--------------------------------------------|----------------|-------------|-------------|-------------|---------------|
| PDTO1  | primary tumor    | rectum                    | M1 (liver)                                 | MSS            | wt          | wt          | wt          | wt            |
| PDTO2  | liver metastasis | colon                     | M1 (liver)                                 | MSS            | wt          | wt          | wt          | wt            |
| PDTO4  | primary tumor    | caecum                    | M0                                         | MSS            | G12D        | wt          | wt          | wt            |
| PDTO5  | liver metastasis | colon                     | M1 (liver)                                 | MSS            | wt          | wt          | wt          | wt            |
| PDTO7  | liver metastasis | rectum                    | M1 (liver)                                 | MSS            | wt          | wt          | wt          | wt            |
| PDTO9  | primary tumor    | colon                     | M0                                         | MSS            | G13D        | wt          | wt          | wt            |
| PDTO10 | primary tumor    | caecum                    | M0                                         | MSS            | wt          | wt          | wt          | wt            |
| PDTO13 | primary tumor    | rectum                    | M0                                         | MSS            | wt          | G12R        | wt          | E545A         |
| PDTO16 | liver metastasis | colon                     | M1 (liver)                                 | MSS            | wt          | wt          | wt          | wt            |
| PDTO17 | primary tumor    | colon                     | M0                                         | MSS            | G12R        | wt          | wt          | wt            |

**Additional file 5: Information on the patient-derived (tumor) organoid models used in this study**

Patient-derived organoids from human benign large intestinal or CRC tissue were established and molecularly characterized as described in the Materials and Methods section. Numbering is in accordance with our laboratory internal designation of PDO lines. Missing numbers refer to PDOs not analyzed in this study and these PDOs were either microsatellite unstable (MSI) or showed a limited ex vivo growth capacity insufficient for the experiments performed in this study.

PDO: patient-derived organoid. PDO: patient-derived tumor organoid. MSS: microsatellite stable. wt: wild-type. NM: normal mucosa. CRC: colorectal cancer

M0: no distant metastasis detected; M1: positive for liver metastasis
