# Supplementary material for: Wnt-driven LARGE2 mediates laminin-adhesive O-glycosylation in human colonic epithelial cells and colorectal cancer
Source: PubMed Central journal article supplement (PMC7315491; doi:10.1186/s12964-020-00561-6), 2020-06-25
Supplement: 12964_2020_561_MOESM6_ESM.pdf [file 12964_2020_561_MOESM6_ESM.pdf]

A

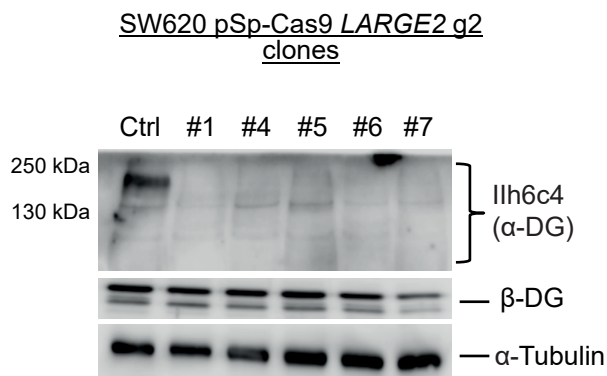

B

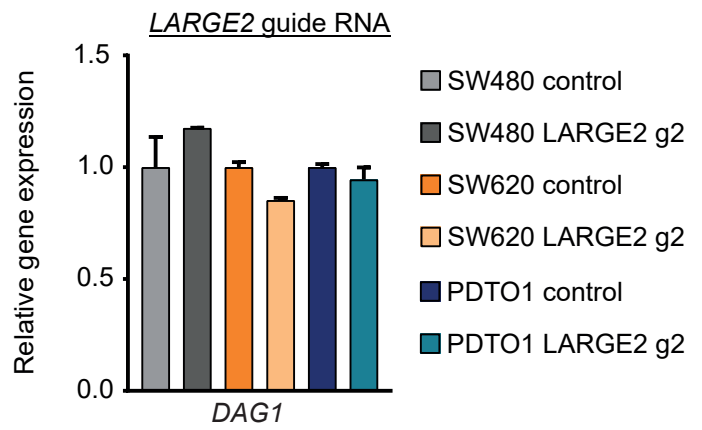

C

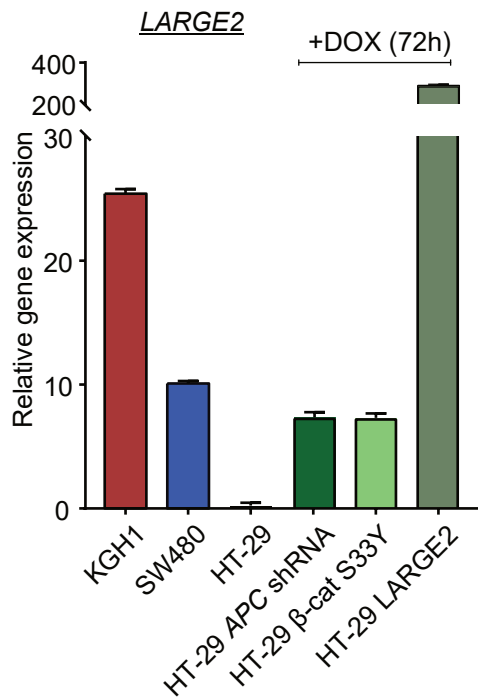

D

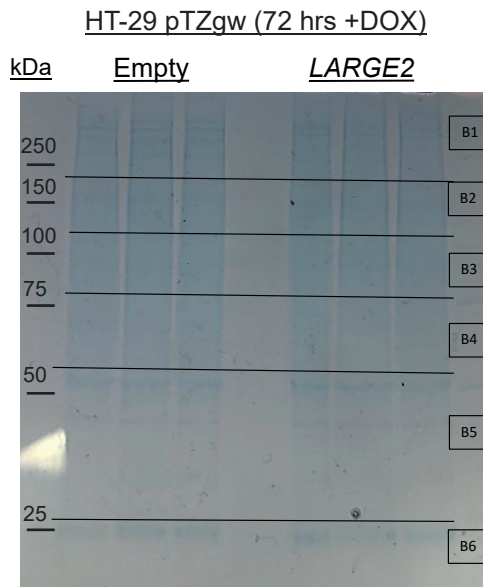

E

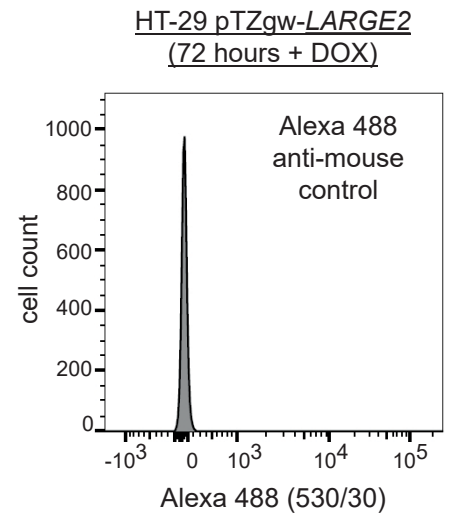

G

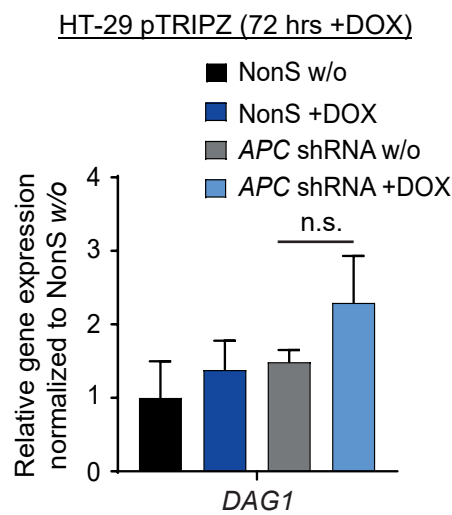

H

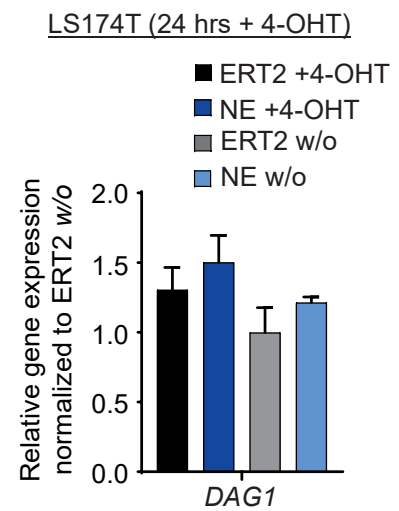

I

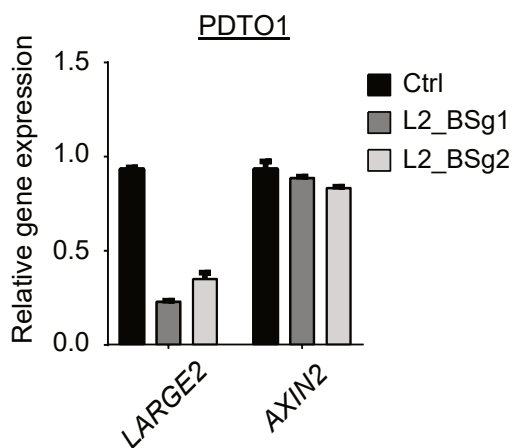

## Additional file 6: O-glycosylation of $\alpha$ -DG is mediated by Wnt-signaling through LARGE2

**A)** KO of *LARGE2* in CRISPR/Cas9-edited SW620 single clones after transient transfection with a plasmid encoding for Cas9 and guide2. Western Blot analysis of WGA-enriched glycoproteins was used to detect  $\alpha$ -DG, WCL were used to detect  $\beta$ -DG and tubulin.

**B)** qRT-PCR analysis of DAG1 expression after CRISPR/Cas9 mediated KO of *LARGE2* in SW480, SW620 cells and PDO1.

**C)** Analysis of endogenous *LARGE2* gene expression via qRT-PCR in PDO1 and CRC cell line SW480, in HT-29 cells wild-type or after conditional expression of APC shRNA or mutant  $\beta$ -catenin ( $\beta$ -cat S33Y), in comparison to the DOX-induced ectopic expression of *LARGE2* in stably transduced HT-29 cells (HT-29 *LARGE2*). Results are shown as mean  $\pm$  SD from technical duplicates.

**D)** Cell lysates from HT-29 cells over-expressing *LARGE2* or control cells (+DOX, 72 hrs) were enriched for glycoproteins, separated via SDS-PAGE and divided into 6 fractions B1-B6 according to their molecular weight for qLC-MS/MS analysis as indicated.

**E)** Secondary antibody control staining (Alexa 488 IgG) from single cell FACS analysis of HT-29 cells (see Fig. 3F).

**F)** Sanger sequencing on genomic DNA from HT-29 single cell-derived cell lines, comparing the wild-type (wt) TCF7L2\_BS and CRISPR/Cas9-mutated binding sites (BS) after editing with guideRNA1 (BSg1) and guideRNA2 (BSg2). TCF7L2 binding motif is highlighted in orange.

**G,H)** qRT-PCR analysis of DAG1 expression upon *APC* silencing for 72 hrs in HT-29 (**G**) and Wnt pathway down-modulation in LS174T (**H**) cells. Gene expression is relative to NonS without DOX or ERT2 control without 4-OHT treatment, respectively. Results are shown as mean  $\pm$  SD (n=3). n.s. not significant.

**I)** qRT-PCR analysis of indicated genes in PDO1 after CRISPR/Cas9-mediated mutation of the TCF7L2\_BS in intron 1 of *LARGE2* using two different guide RNAs (L2\_BSg1 and LS\_BSg2). Results are shown as mean  $\pm$  SD from three technical replicates.
