# Supplementary material for: Wnt-driven LARGE2 mediates laminin-adhesive O-glycosylation in human colonic epithelial cells and colorectal cancer
Source: PubMed Central journal article supplement (PMC7315491; doi:10.1186/s12964-020-00561-6), 2020-06-25
Supplement: 12964_2020_561_MOESM7_ESM.pdf [file 12964_2020_561_MOESM7_ESM.pdf]

Table S3\_DAG1 peptide intensities from qLC-MS/MS analysis page 1

| Gene | Sequence                             | Position in protein |              | Intensity Control R1 |        |            |        |           |           |
|------|--------------------------------------|---------------------|--------------|----------------------|--------|------------|--------|-----------|-----------|
|      |                                      | Start position      | End position | R1 B01               | R1 B02 | R1 B03     | R1 B04 | R1 B05    | R1 B06    |
| DAG1 | SFRVTIPTDLIASSGDIK                   | 77                  | 95           | 0                    | 0      | 0          | 0      | 0         | 0         |
| DAG1 | VTIPTDLIASSGDIK                      | 80                  | 95           | 0                    | 0      | 0          | 0      | 134930000 | 0         |
| DAG1 | EALPSWLHWDSQSHTLEGLPLDSDKGVHYISVSATR | 102                 | 137          | 0                    | 0      | 0          | 0      | 0         | 0         |
| DAG1 | GVHYISVSATR                          | 127                 | 137          | 0                    | 0      | 0          | 0      | 0         | 0         |
| DAG1 | SFSEVELHNMK                          | 216                 | 226          | 0                    | 0      | 0          | 0      | 91186000  | 0         |
| DAG1 | LVPVVNNR                             | 227                 | 234          | 0                    | 0      | 0          | 0      | 249210000 | 0         |
| DAG1 | LFDMSAFMAGPGNAK                      | 235                 | 249          | 0                    | 0      | 0          | 0      | 24582000  | 0         |
| DAG1 | KVVENGALLSWK                         | 250                 | 261          | 0                    | 0      | 0          | 0      | 43770000  | 0         |
| DAG1 | VVENGALLSWK                          | 251                 | 261          | 0                    | 0      | 0          | 0      | 37121000  | 0         |
| DAG1 | LGCSLNQNSVPDIHGVEAPAR                | 262                 | 282          | 0                    | 0      | 0          | 0      | 62746000  | 0         |
| DAG1 | EGAMSAQLGYPVVGWHIANK                 | 283                 | 302          | 0                    | 0      | 0          | 0      | 0         | 0         |
| DAG1 | GGEPNQRPELK                          | 490                 | 500          | 0                    | 0      | 639550000  | 0      | 0         | 0         |
| DAG1 | NHIDRVDAWVGTYFEVK                    | 501                 | 517          | 0                    | 0      | 21699000   | 0      | 0         | 0         |
| DAG1 | IPSDTFYDHEDTTTDK                     | 518                 | 533          | 0                    | 0      | 50938000   | 0      | 0         | 0         |
| DAG1 | IPSDTFYDHEDTTTDKLLK                  | 518                 | 535          | 0                    | 0      | 1055200000 | 0      | 0         | 0         |
| DAG1 | LREQQLVGEK                           | 540                 | 549          | 0                    | 0      | 480800000  | 0      | 0         | 0         |
| DAG1 | EQQLVGEK                             | 542                 | 549          | 0                    | 0      | 99329000   | 0      | 0         | 0         |
| DAG1 | SWVQFNSNSQLMYGLPDSSHVKG              | 550                 | 572          | 0                    | 0      | 0          | 0      | 0         | 0         |
| DAG1 | HEYFMHATDK                           | 573                 | 582          | 0                    | 0      | 130450000  | 0      | 0         | 0         |
| DAG1 | GGLSAVDAFEIHVHR                      | 583                 | 597          | 0                    | 0      | 150300000  | 0      | 0         | 0         |
| DAG1 | AKFVGDPAVLVNDIHKK                    | 610                 | 626          | 0                    | 0      | 46269000   | 0      | 0         | 0         |
| DAG1 | FVGDPALVNDIHK                        | 612                 | 625          | 0                    | 0      | 283600000  | 0      | 0         | 0         |
| DAG1 | FVGDPALVNDIHKK                       | 612                 | 626          | 0                    | 0      | 1125400000 | 0      | 0         | 0         |
| DAG1 | KLAFAFGDR                            | 632                 | 640          | 0                    | 0      | 34634000   | 0      | 0         | 0         |
| DAG1 | EQIAGLSR                             | 672                 | 679          | 0                    | 0      | 0          | 0      | 0         | 761830000 |
| DAG1 | EQIAGLSRR                            | 672                 | 680          | 0                    | 0      | 0          | 0      | 0         | 27380000  |
| DAG1 | RIAEDDGKPR                           | 680                 | 689          | 0                    | 0      | 0          | 0      | 0         | 0         |
| DAG1 | IAEDDGKPR                            | 681                 | 689          | 0                    | 0      | 0          | 0      | 0         | 18456000  |
| DAG1 | IAEDDGKPRPAFSNALEPDFK                | 681                 | 701          | 0                    | 0      | 0          | 0      | 0         | 211430000 |
| DAG1 | PAFSNALEPDFK                         | 690                 | 701          | 0                    | 0      | 0          | 0      | 0         | 46628000  |
| DAG1 | PAFSNALEPDFKATSITVTGSGSCR            | 690                 | 714          | 0                    | 0      | 0          | 0      | 0         | 0         |
| DAG1 | ATSITVTGSGSCR                        | 702                 | 714          | 0                    | 0      | 0          | 0      | 0         | 52295000  |
| DAG1 | HLQFIPVPPR                           | 715                 | 725          | 0                    | 0      | 0          | 0      | 53559000  | 380280000 |
| DAG1 | LTLEDQATFIK                          | 783                 | 793          | 0                    | 0      | 0          | 0      | 0         | 0         |
| DAG1 | LTLEDQATFIKK                         | 783                 | 794          | 0                    | 0      | 0          | 0      | 0         | 0         |
| DAG1 | GVPIFADELDDSKPPSSSMLILQEEK           | 795                 | 823          | 0                    | 0      | 0          | 0      | 0         | 0         |
| DAG1 | SPPPYVPP                             | 888                 | 895          | 0                    | 0      | 0          | 0      | 0         | 0         |

Table S3\_DAG1 peptide intensities from qLC-MS/MS analysis page 2

| Intensity Control R2 |        |            |        |           |           | Intensity Control R3 |        |           |        |           |           |
|----------------------|--------|------------|--------|-----------|-----------|----------------------|--------|-----------|--------|-----------|-----------|
| R2 B01               | R2 B02 | R2 B03     | R2 B04 | R2 B05    | R2 B06    | R3 B01               | R3 B02 | R3 B03    | R3 B04 | R3 B05    | R3 B06    |
| 0                    | 0      | 0          | 0      | 67543000  | 0         | 0                    | 0      | 0         | 0      | 0         | 0         |
| 0                    | 0      | 0          | 0      | 124130000 | 0         | 0                    | 0      | 0         | 0      | 69380000  | 0         |
| 0                    | 0      | 0          | 0      | 0         | 0         | 0                    | 0      | 0         | 0      | 0         | 0         |
| 0                    | 0      | 0          | 0      | 0         | 0         | 0                    | 0      | 0         | 0      | 0         | 0         |
| 0                    | 0      | 0          | 0      | 54770000  | 0         | 0                    | 0      | 0         | 0      | 81254000  | 0         |
| 0                    | 0      | 0          | 0      | 162710000 | 0         | 0                    | 0      | 0         | 0      | 0         | 0         |
| 0                    | 0      | 0          | 0      | 31315000  | 0         | 0                    | 0      | 0         | 0      | 34035000  | 0         |
| 0                    | 0      | 0          | 0      | 37846000  | 0         | 0                    | 0      | 0         | 0      | 0         | 0         |
| 0                    | 0      | 0          | 0      | 28483000  | 0         | 0                    | 0      | 0         | 0      | 36326000  | 0         |
| 0                    | 0      | 0          | 0      | 75891000  | 0         | 0                    | 0      | 0         | 0      | 53752000  | 0         |
| 0                    | 0      | 0          | 0      | 63425000  | 0         | 0                    | 0      | 0         | 0      | 47445000  | 0         |
| 0                    | 0      | 426040000  | 0      | 0         | 0         | 0                    | 0      | 194990000 | 0      | 0         | 0         |
| 0                    | 0      | 0          | 0      | 0         | 0         | 0                    | 0      | 0         | 0      | 0         | 0         |
| 0                    | 0      | 0          | 0      | 0         | 0         | 0                    | 0      | 0         | 0      | 0         | 0         |
| 0                    | 0      | 725920000  | 0      | 0         | 0         | 0                    | 0      | 75216000  | 0      | 0         | 0         |
| 0                    | 0      | 1065900000 | 0      | 0         | 0         | 0                    | 0      | 880270000 | 0      | 0         | 0         |
| 0                    | 0      | 524820000  | 0      | 0         | 0         | 0                    | 0      | 341560000 | 0      | 0         | 0         |
| 0                    | 0      | 0          | 0      | 0         | 0         | 0                    | 0      | 0         | 0      | 0         | 0         |
| 0                    | 0      | 102910000  | 0      | 0         | 0         | 0                    | 0      | 28255000  | 0      | 0         | 0         |
| 0                    | 0      | 104700000  | 0      | 0         | 0         | 0                    | 0      | 88633000  | 0      | 0         | 0         |
| 0                    | 0      | 0          | 0      | 0         | 0         | 0                    | 0      | 35621000  | 0      | 0         | 0         |
| 0                    | 0      | 172500000  | 0      | 0         | 0         | 0                    | 0      | 28053000  | 0      | 0         | 0         |
| 0                    | 0      | 820130000  | 0      | 0         | 0         | 0                    | 0      | 499660000 | 0      | 0         | 0         |
| 0                    | 0      | 27004000   | 0      | 0         | 0         | 0                    | 0      | 22188000  | 0      | 0         | 0         |
| 0                    | 0      | 0          | 0      | 0         | 698560000 | 0                    | 0      | 0         | 0      | 135170000 | 775650000 |
| 0                    | 0      | 0          | 0      | 0         | 64810000  | 0                    | 0      | 0         | 0      | 24871000  | 66832000  |
| 0                    | 0      | 0          | 0      | 0         | 15461000  | 0                    | 0      | 0         | 0      | 5180600   | 28959000  |
| 0                    | 0      | 0          | 0      | 0         | 9765100   | 0                    | 0      | 0         | 0      | 9033100   | 0         |
| 0                    | 0      | 0          | 0      | 0         | 131710000 | 0                    | 0      | 0         | 0      | 0         | 159140000 |
| 0                    | 0      | 0          | 0      | 0         | 0         | 0                    | 0      | 0         | 0      | 0         | 74520000  |
| 0                    | 0      | 0          | 0      | 0         | 0         | 0                    | 0      | 0         | 0      | 0         | 11455000  |
| 0                    | 0      | 0          | 0      | 0         | 57443000  | 0                    | 0      | 0         | 0      | 0         | 40957000  |
| 0                    | 0      | 0          | 0      | 0         | 514710000 | 0                    | 0      | 0         | 0      | 15329000  | 427900000 |
| 0                    | 0      | 0          | 0      | 0         | 0         | 0                    | 0      | 0         | 0      | 27900000  | 0         |
| 0                    | 0      | 0          | 0      | 0         | 0         | 0                    | 0      | 0         | 0      | 29932000  | 0         |
| 0                    | 0      | 0          | 0      | 0         | 0         | 0                    | 0      | 0         | 0      | 0         | 0         |
| 0                    | 0      | 0          | 0      | 0         | 0         | 0                    | 0      | 0         | 0      | 17323000  | 0         |



Table S3\_DAG1 peptide intensities from qLC-MS/MS analysis page 4

| Intensity Overexpression R3 |           |           |        |           |           | MS/MS Count | Length | Mass      | Score  |
|-----------------------------|-----------|-----------|--------|-----------|-----------|-------------|--------|-----------|--------|
| R3 B01                      | R3 B02    | R3 B03    | R3 B04 | R3 B05    | R3 B06    |             |        |           |        |
| 0                           | 0         | 0         | 0      | 0         | 0         | 1           | 19     | 2032.1205 | 62.739 |
| 0                           | 0         | 0         | 0      | 194140000 | 0         | 10          | 16     | 1641.9189 | 120.53 |
| 0                           | 0         | 0         | 0      | 106200000 | 0         | 4           | 36     | 4044.997  | 115.71 |
| 0                           | 0         | 0         | 0      | 34669000  | 0         | 3           | 11     | 1188.6251 | 69.346 |
| 0                           | 0         | 0         | 0      | 103670000 | 0         | 15          | 11     | 1319.618  | 214.83 |
| 0                           | 0         | 0         | 0      | 298390000 | 0         | 7           | 8      | 909.5396  | 106.76 |
| 0                           | 0         | 0         | 0      | 31684000  | 0         | 6           | 15     | 1555.7163 | 162.36 |
| 0                           | 0         | 0         | 0      | 61818000  | 0         | 7           | 12     | 1342.7609 | 155.99 |
| 0                           | 0         | 0         | 0      | 55041000  | 0         | 6           | 11     | 1214.6659 | 140.75 |
| 0                           | 0         | 0         | 0      | 99791000  | 0         | 7           | 21     | 2233.091  | 218.72 |
| 0                           | 0         | 0         | 0      | 113090000 | 0         | 8           | 20     | 2127.0571 | 66.777 |
| 234330000                   | 43821000  | 34875000  | 0      | 0         | 0         | 22          | 11     | 1223.6258 | 183.57 |
| 49008000                    | 0         | 0         | 0      | 0         | 0         | 3           | 17     | 2048.0116 | 161.99 |
| 0                           | 0         | 0         | 0      | 0         | 0         | 1           | 16     | 1883.8061 | 126.63 |
| 521720000                   | 51600000  | 174130000 | 0      | 0         | 0         | 28          | 18     | 2124.9851 | 362.15 |
| 553020000                   | 106450000 | 263690000 | 0      | 0         | 0         | 16          | 10     | 1198.667  | 96.009 |
| 50746000                    | 0         | 0         | 0      | 0         | 0         | 7           | 8      | 929.48181 | 164.68 |
| 46458000                    | 0         | 0         | 0      | 0         | 0         | 2           | 23     | 2580.2067 | 95.138 |
| 63504000                    | 0         | 0         | 0      | 0         | 0         | 10          | 10     | 1277.5499 | 111.86 |
| 145700000                   | 57324000  | 0         | 0      | 0         | 0         | 14          | 15     | 1606.8216 | 125.53 |
| 0                           | 0         | 0         | 0      | 0         | 0         | 2           | 17     | 1864.0571 | 93.269 |
| 146090000                   | 40618000  | 0         | 0      | 0         | 0         | 19          | 14     | 1536.83   | 184.03 |
| 547180000                   | 123550000 | 172100000 | 0      | 0         | 0         | 27          | 15     | 1664.925  | 184.31 |
| 52787000                    | 0         | 0         | 0      | 0         | 0         | 6           | 9      | 1023.5502 | 110.76 |
| 0                           | 0         | 0         | 0      | 97950000  | 734310000 | 9           | 8      | 872.47158 | 105.25 |
| 0                           | 0         | 0         | 0      | 0         | 37622000  | 7           | 9      | 1028.5727 | 126.41 |
| 0                           | 0         | 0         | 0      | 0         | 0         | 2           | 10     | 1155.5996 | 68.355 |
| 0                           | 0         | 0         | 0      | 0         | 25157000  | 6           | 9      | 999.49852 | 106.04 |
| 0                           | 0         | 0         | 0      | 0         | 159930000 | 12          | 21     | 2316.1386 | 172.61 |
| 0                           | 0         | 0         | 0      | 0         | 45000000  | 5           | 12     | 1334.6507 | 199.03 |
| 0                           | 0         | 0         | 0      | 0         | 0         | 1           | 25     | 2612.2541 | 101.3  |
| 0                           | 0         | 0         | 0      | 0         | 76633000  | 7           | 13     | 1295.614  | 141.1  |
| 0                           | 0         | 0         | 0      | 58290000  | 686600000 | 61          | 11     | 1301.7608 | 166.3  |
| 0                           | 0         | 0         | 0      | 26808000  | 0         | 3           | 11     | 1277.6867 | 125.56 |
| 0                           | 0         | 0         | 0      | 0         | 0         | 1           | 12     | 1405.7817 | 73.082 |
| 0                           | 0         | 0         | 0      | 0         | 0         | 1           | 29     | 3151.5999 | 110.03 |
| 0                           | 0         | 0         | 0      | 0         | 0         | 1           | 8      | 852.43815 | 115.83 |

## **Additional file 7: DAG1 peptide intensities from qLC-MS/MS analysis after overexpression of LARGE2 in HT-29 cells**

Shown are the DAG1 peptide sequences, as detected by LC-MS/MS (see methods section for details). DAG1 peptide processing is defined as follows: position 1-29: signal peptide; 30-653:  $\alpha$ -Dystroglycan; 654-895:  $\beta$ -Dystroglycan. B1 – B6: pre-fractionated samples according to their molecular weight, as described in Figure 3D. Control: Dox-treated HT-29 control cells, Overexpression: Dox-induced LARGE2 expression in HT-29 cells.
