# Supplementary material for: Wnt-driven LARGE2 mediates laminin-adhesive O-glycosylation in human colonic epithelial cells and colorectal cancer
Source: PubMed Central journal article supplement (PMC7315491; doi:10.1186/s12964-020-00561-6), 2020-06-25
Supplement: 12964_2020_561_MOESM9_ESM.pdf [file 12964_2020_561_MOESM9_ESM.pdf]

A

ISH on mouse ileum

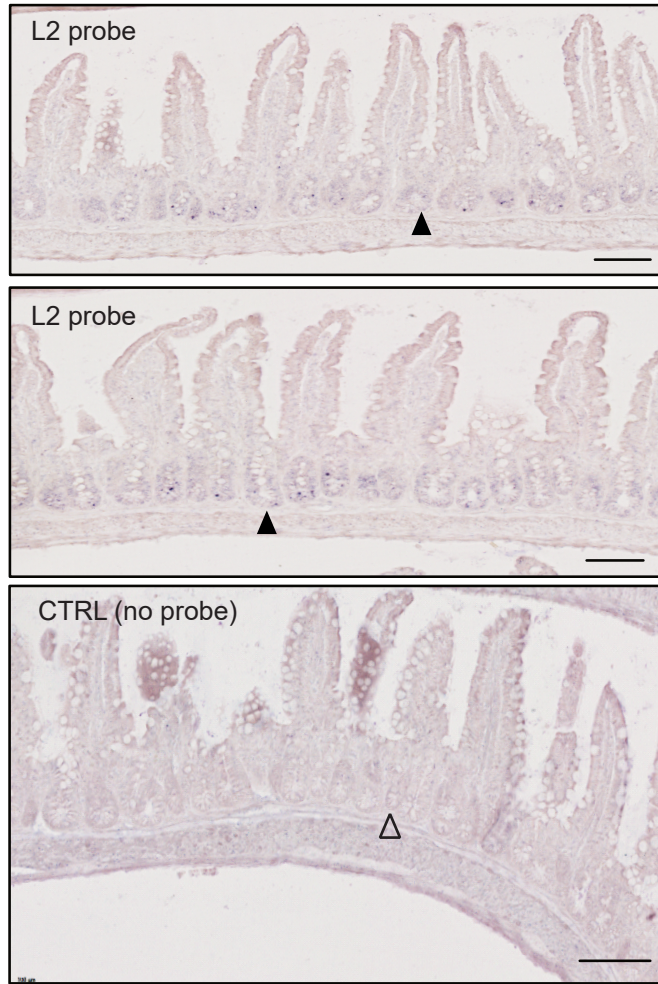

B

Heart (mouse)

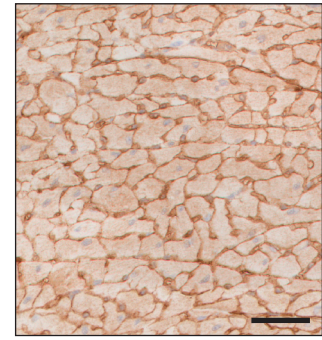

Ilh6 (α-DG)

C

Heart (mouse)

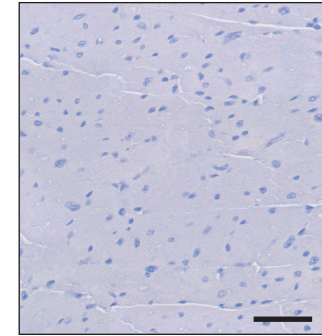

IgM ctrl

D

ISH on mouse ileum  
(ApcMin)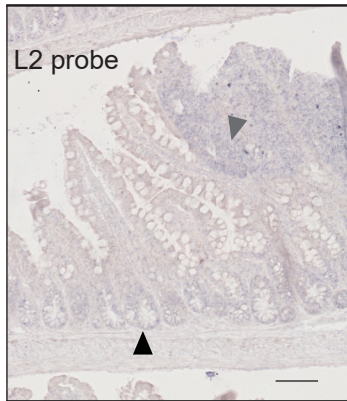

E

ISH on mouse ileum  
(ApcMin)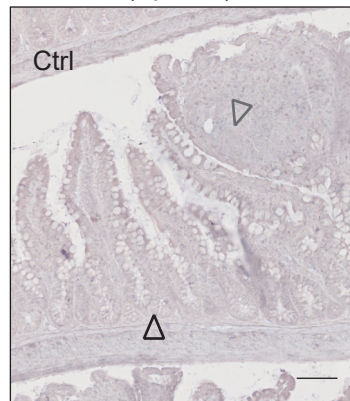

F

PDO3:

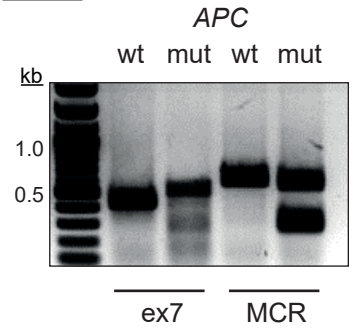

G

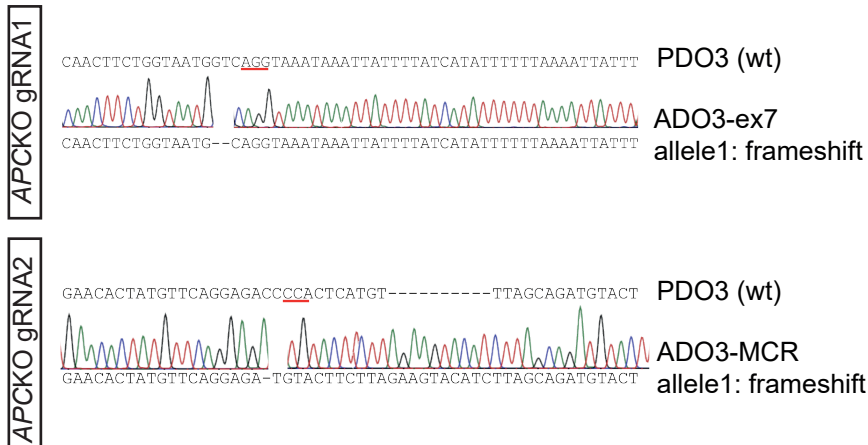

H

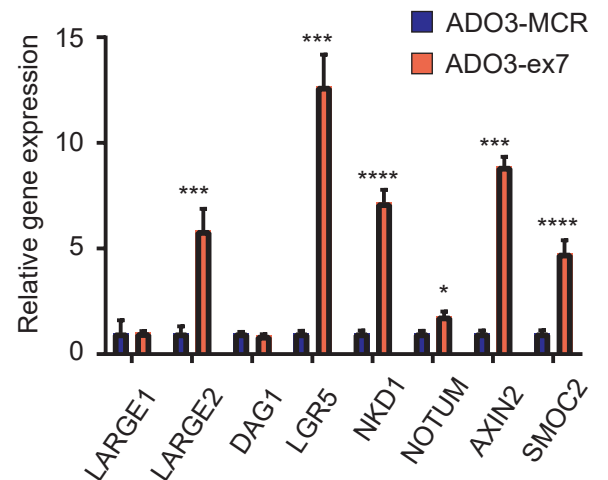

**Additional file 9: LARGE2 expression in mouse adenoma, and human engineered adenoma organoid (ADO) pairs carrying different APC truncation mutations**

**A)** In-situ hybridization on mouse ileum tissue from FFPE sections with a *Large2* specific probe (top and middle) or without probe (control, bottom). Scale bars indicate 100  $\mu$ m.

**B,C)** Immunohistochemistry staining on FFPE sections of mouse heart muscle tissue, using Ilh6 antibody as positive control (**B**) for  $\alpha$ -DG staining and IgM as negative control (**C**). Scale bar indicates 50  $\mu$ m.

**D,E)** In-situ hybridization of a *Large2* probe (**D**) and control probe (**E**) on mouse ileum from APC<sup>min</sup> mice. Black arrowhead indicates specific staining at the crypt base; grey arrowhead indicates staining in Wnt-driven adenoma. Clear arrowheads show lack of staining in the control experiment.

**F,G)** Mutation detection assay on genomic DNA derived from additional human normal mucosa organoids (wt) or APC mutated adenoma organoids PDO3 (mut, ex7, MCR) (**F**) and sanger sequencing profile (**G**) of both APC mutated organoid lines (Top: ADO3-ex7, Bottom: ADO3-MCR). Shown are deletions and frameshifts indicative of CRISPR/Cas9-mediated mutations in APC in PDO3.

**H)** qRT-PCR analysis of the indicated genes in adenomas engineered by CRISPR/Cas9-mediated targeting of APC in normal mucosa (ADO3-MCR versus ADO3-ex7). Shown is the mean  $\pm$  SD (n=3). \* p < 0.01, \*\*\* p < 0.001, \*\*\*\* p < 0.0001
