# Supplementary material for: Wnt-driven LARGE2 mediates laminin-adhesive O-glycosylation in human colonic epithelial cells and colorectal cancer
Source: PubMed Central journal article supplement (PMC7315491; doi:10.1186/s12964-020-00561-6), 2020-06-25
Supplement: 12964_2020_561_MOESM11_ESM.pdf [file 12964_2020_561_MOESM11_ESM.pdf]

Table S4\_M0 M1 RNA cohort  
related to Figure 7C

| Liver metastatic CRC      | Gender (m=0/f=1)         | Localisation 1 Primarius | Localisation 2 Primarius | Localisation 3 Primarius | Grading    | pT-Stadium | pN-Status | pM-Status | R-Status | L-Status | V-Status |
|---------------------------|--------------------------|--------------------------|--------------------------|--------------------------|------------|------------|-----------|-----------|----------|----------|----------|
| <b>M1 (ID)</b>            |                          |                          |                          |                          |            |            |           |           |          |          |          |
| 41C                       | 0                        | 1                        | 67                       | 1                        | 2          | 3          | 1         | X         | 0        |          |          |
| 17C                       | 0                        | 2                        | 8                        | 1                        | 2          | 3          | 0         | 0         | 0        |          |          |
| 11C                       | 1                        | 0                        | 4                        | 1                        | 2          | 4          | 0         | 0         | 0        | 0        | 0        |
| 28C                       | 1                        | 1                        | 67                       | 1                        | 2          | 3          | 2         |           | 0        | 1        | 0        |
| 40C                       | 0                        | 2                        | 9                        | 1                        | 2          | 3          | 1         | 0         | 0        | 1        |          |
| 58C                       | 0                        | 2                        | 8                        | 1                        | 2          | 3          | 2         | 1         | 0        | 1        | 0        |
| 21C                       | 0                        | 2                        | 9                        | 1                        | 2          | 3          | 1         | 0         | 1        |          |          |
| 79C                       | 0                        | 2                        | 7                        | 1                        | 2          | 3          | 1         | 1         |          |          |          |
| 10C                       | 0                        | 0                        | 6                        | 1                        | 2          | 4          | 0         | X         |          |          |          |
| 48C                       | 0                        | 0                        | 0                        | 0                        | 3          | 4          | 2         | X         |          |          |          |
| 39C                       | 1                        | 0                        | 5                        | 1                        | 3          | 3          | 1         | X         |          |          |          |
| 34C                       | 0                        | 2                        | 9                        | 1                        | 2          | 2          | 0         | 0         | 0        | 0        | 1        |
| <b>Non-metastatic CRC</b> |                          |                          |                          |                          |            |            |           |           |          |          |          |
| Gender (m=0/f=1)          | Localisation 1 Primarius | Localisation 2 Primarius | Localisation 3 Primarius | Grading                  | pT-Stadium | pN-Status  | pM-Status | R-Status  | L-Status | V-Status |          |
| <b>M0 (ID)</b>            |                          |                          |                          |                          |            |            |           |           |          |          |          |
| 34B                       | 0                        | 0                        | 6                        | 1                        | 2          | 2          | 1         | 0         | 0        |          |          |
| 79B                       | 0                        | 2                        | 9                        | 1                        | 2          | 3          | 0         | 0         | 1        |          |          |
| 10B                       | 0                        | 0                        | 6                        | 1                        | 2          | 4          | 0         | 0         |          |          |          |
| 11B                       | 1                        | 0                        | 6                        | 1                        | 2          | 4          | 0         | 0         |          |          |          |
| 71B                       | 0                        | 0                        | 0                        | 0                        | 2          | 3          | 2         | 0         |          |          |          |
| 47B                       | 1                        | 0                        | 1                        | 0                        | 3          | 3          | 1         | 0         | 0        |          |          |
| 58B                       | 0                        | 1                        | 67                       | 1                        | 2          | 3          | 1         | 0         |          |          |          |
| 40B                       | 0                        | 2                        | 7                        | 1                        | 2          | 3          | 0         | 0         | 0        | 0        | 0        |
| 19B                       | 0                        | 0                        | 0                        | 0                        | 2          | 3          | 0         | 0         | 0        | 0        | 0        |
| 69B                       | 0                        | 0                        | 1                        | 0                        | 2          | 3          | 1         | 0         |          |          |          |
| 21B                       | 0                        | 2                        | 9                        | 1                        | 2          | 3          | 0         | 0         | 0        |          |          |
| 48B                       | 0                        | 0                        | 1                        | 0                        | 3          | 4          | 0         | 0         |          |          |          |

Localisation 1 Primarius (0=Colon; 1= rectosigmoid junction, 2=Rectum)

Localisation 2 Primarius (Cecum = 0; Appendix = 00; Colon ascendens = 1; right Colonflexure = 2; Colon transversum = 3;  
left Colonflexure = 4; Colon descendens = 5; Sigma = 6; 67 = rectosigmoid junction;  
upper third of the rectum = 7; middle third of the rectum = 8; lower third of the rectum = 9)

Localisation 3 Primarius (0=right; 1=left)

pT-Stadium postoperative (p) (T1= 1; T2= 2; T3 = 3; T4 = 4)

pN-Status postoperative (p) (=LN-Status) (N0=no LN diseased ; N1=1; N2=2)

pM-Status postoperative (p) (M0 = no distant metastasis; M1 = metastasis to distant organs)

R-Status postoperative (R0 = 0, R1 = 1; R2 = 2)

L-Status postoperative (invasion into lymphatic vessels =1; no invasion = 0)

V-Status postoperative (Invasion into vein =1; no invasion = 0)

### **Additional file 11: Information on the FFPE colorectal cancer tissue samples LARGE2 gene expression analysis**

Clinical information of the FFPE colorectal cancer tissue samples, M1 (liver metastatic) or M0 (non-metastatic), which were used for RNA isolation and Taqman-based qRT-PCR analyses of *LARGE2* gene expression (see Figure 7C).
