# Supplementary material for: Wnt-driven LARGE2 mediates laminin-adhesive O-glycosylation in human colonic epithelial cells and colorectal cancer
Source: PubMed Central journal article supplement (PMC7315491; doi:10.1186/s12964-020-00561-6), 2020-06-25
Supplement: 12964_2020_561_MOESM12_ESM.pdf [file 12964_2020_561_MOESM12_ESM.pdf]

| Gene Name       | Missense Mutation | Truncating Mutation | Fusion | Amplification | Deep Deletion |
|-----------------|-------------------|---------------------|--------|---------------|---------------|
| <i>DAG1</i>     | 1.52%             | 0.38%               |        |               | 0.38%         |
| <i>POMT1</i>    | 2.47%             | 0.19%               |        | 0.19%         |               |
| <i>POMT2</i>    | 2.47%             | 0.19%               |        |               |               |
| <i>POMGNT1</i>  | 1.71%             | 0.38%               |        |               |               |
| <i>POMGNT2</i>  | 2.47%             | 0.19%               |        | 0.19%         |               |
| <i>MGAT5B</i>   | 2.66%             | 0.95%               |        | 0.76%         |               |
| <i>B3GALNT2</i> | 0.38%             |                     |        | 0.57%         |               |
| <i>POMK</i>     | 0.76%             | 0.38%               | 0.19%  | 3.61%         | 0.19%         |
| <i>FKTN</i>     | 1.14%             | 0.76%               |        |               | 0.19%         |
| <i>FKRP</i>     | 0.57%             |                     |        |               |               |
| <i>RXYLT1</i>   | 0.38%             | 0.57%               |        |               |               |
| <i>B4GAT1</i>   | 1.33%             |                     |        |               | 0.19%         |
| <i>LARGE1</i>   | 3.04%             | 0.38%               |        | 0.19%         | 0.76%         |
| <i>LARGE2</i>   | 1.71%             | 0.76%               |        | 0.19%         |               |
| <i>CHST10</i>   | 3.04%             | 0.57%               |        |               |               |
| <i>DPM1</i>     | 0.57%             | 0.19%               |        | 5.70%         |               |
| <i>DPM2</i>     | 0.19%             |                     |        |               |               |
| <i>DPM3</i>     |                   |                     |        | 0.57%         |               |
| <i>DOLK</i>     | 1.33%             | 0.19%               |        |               |               |
| <i>CRPPA</i>    | 1.52%             | 0.57%               |        | 0.38%         |               |
| <i>HK1</i>      | 2.47%             | 0.19%               | 0.19%  | 0.38%         | 0.19%         |
| <i>MPI</i>      | 0.76%             | 0.38%               |        |               |               |
| <i>PMM2</i>     | 0.38%             | 0.19%               |        |               | 0.19%         |
| <i>GMPPB</i>    | 0.38%             |                     |        | 0.38%         |               |
| <i>FURIN</i>    | 2.47%             | 0.76%               |        | 0.38%         | 0.19%         |

#### Summary for Colorectal (TCGA PanCan)

Gene altered in 32.7% of 526 cases

| Alteration           | Frequency         |
|----------------------|-------------------|
| Mutation             | 18.44% (97 cases) |
| Fusion               | 0.38% (2 cases)   |
| Amplification        | 11.03% (58 cases) |
| Deep Deletion        | 1.71% (9 cases)   |
| Multiple Alterations | 1.14% (6 cases)   |

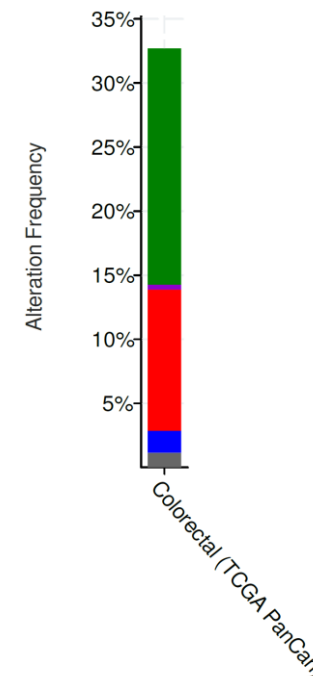

TCGA PanCaner Atlas n=526

### Additional file 12: Mutational status of genes involved in $\alpha$ -DG glycosylation in CRC

We analyzed the genetic status of the indicated genes within the TCGA cohort of 526 colorectal cancer cases (PanCancer Atlas) accessible via the cBioPortal ([www.cbioportal.org](http://www.cbioportal.org)). Percentages give the frequency of a given genetic alteration found in 526 CRC cases. Note that *LARGE1* and *LARGE2* plus 23 factors known to be involved in  $\alpha$ -DG glycosylation were each affected in only a small (3 percent and less) fraction of tumors. Overall, approximately 18.5% of CRC cases harbour mutations in one or several of these genes, and 1.7% of patients were affected by deep deletions on one of the analyzed gene loci.
